# Supplementary material for: Three-Dimensional Electronic Microfliers With Designs Inspired by Wind-Dispersed Seeds
Source: Research Square preprint supplement (doi:10.21203/rs.3.rs-142068/v1), 2021-01-14
Supplement: Supplementary file 1 [file 152461287df2a5875e181cc7.pdf]

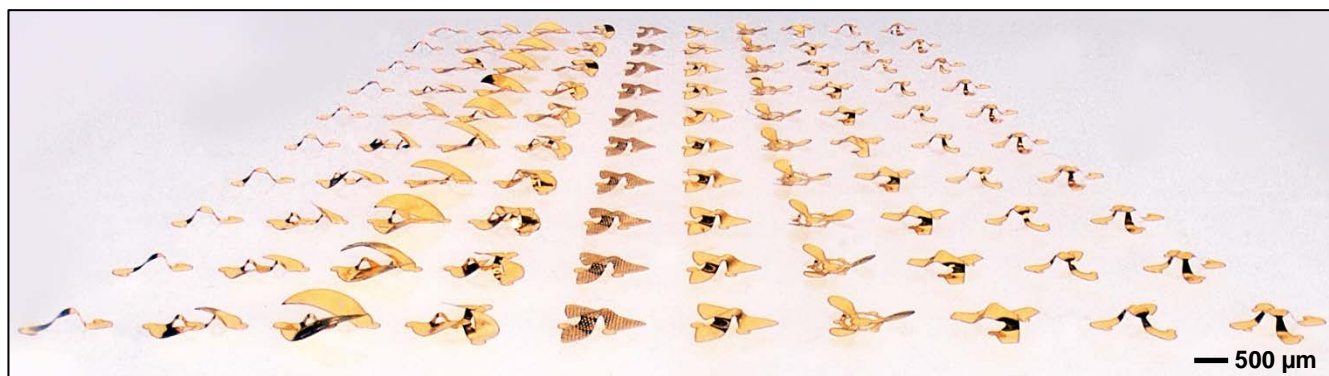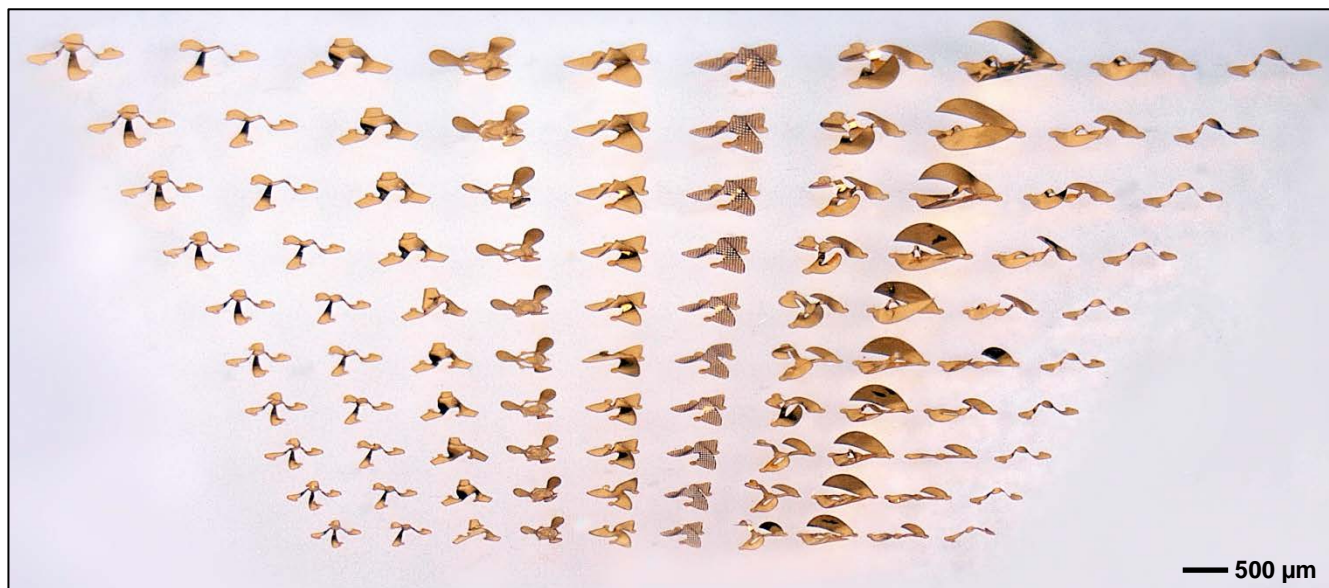

**Figure S1. Bioinspired 3D micro-, and mesofliers.** Photographs of a 10 x 10 array of 3D micro- and mesofliers.

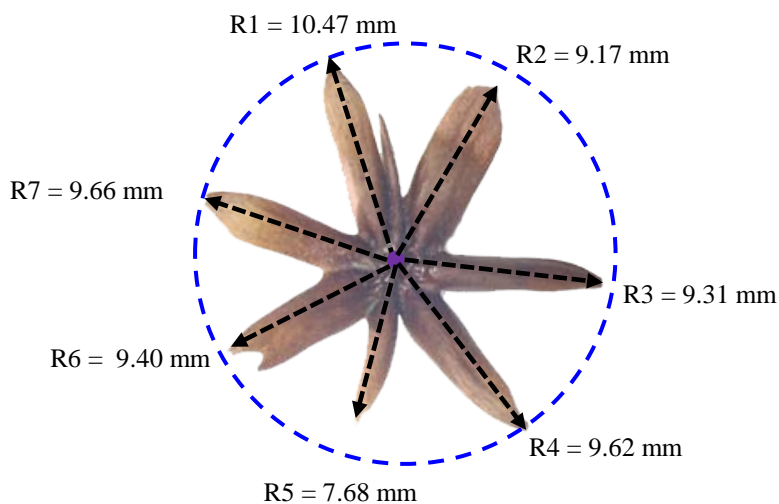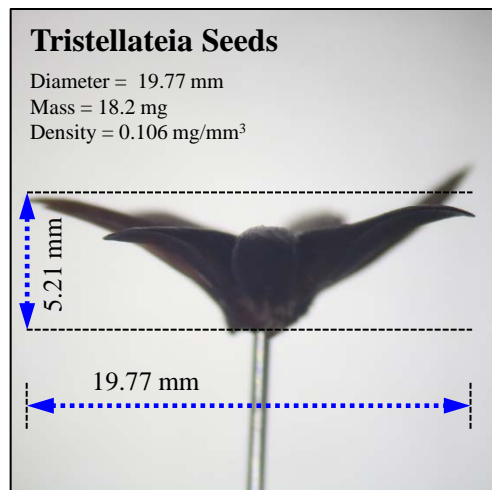

**Figure S2. A tristellateia seed.** Top-view and cross section view photographs of a tristellateia seed.

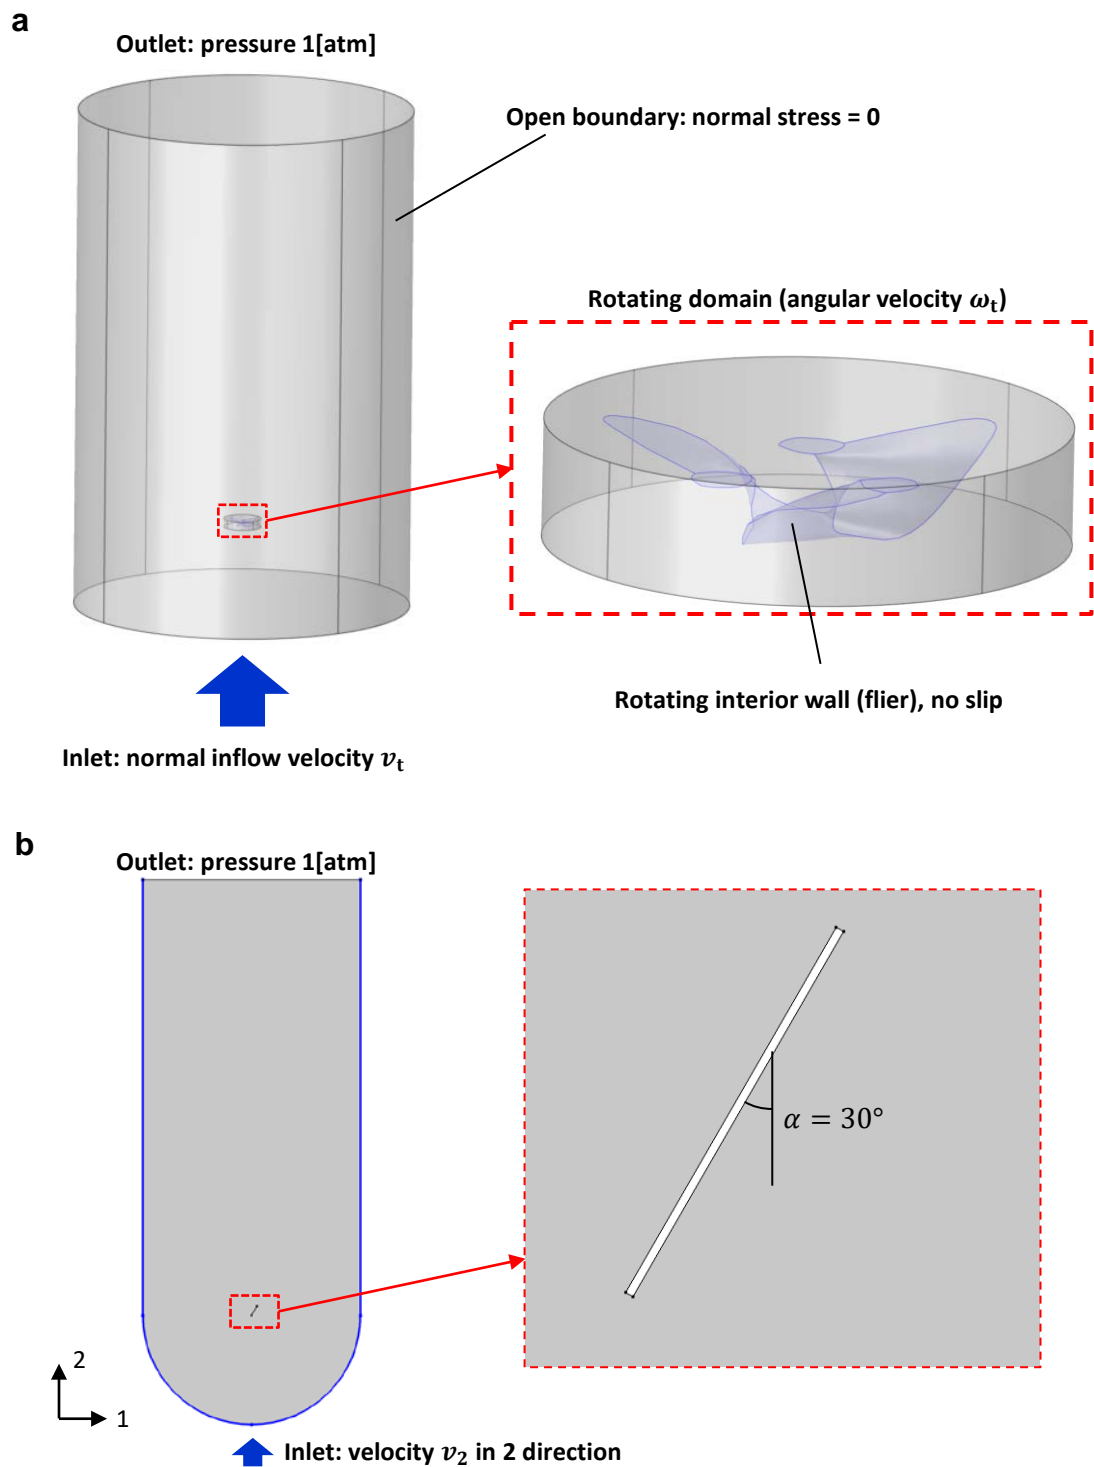

**Figure S3. Schematic diagram of the configuration for Computational Fluid Dynamics Simulation.** (a) 3D rotational falling fliers and (b) 2D airfoil.

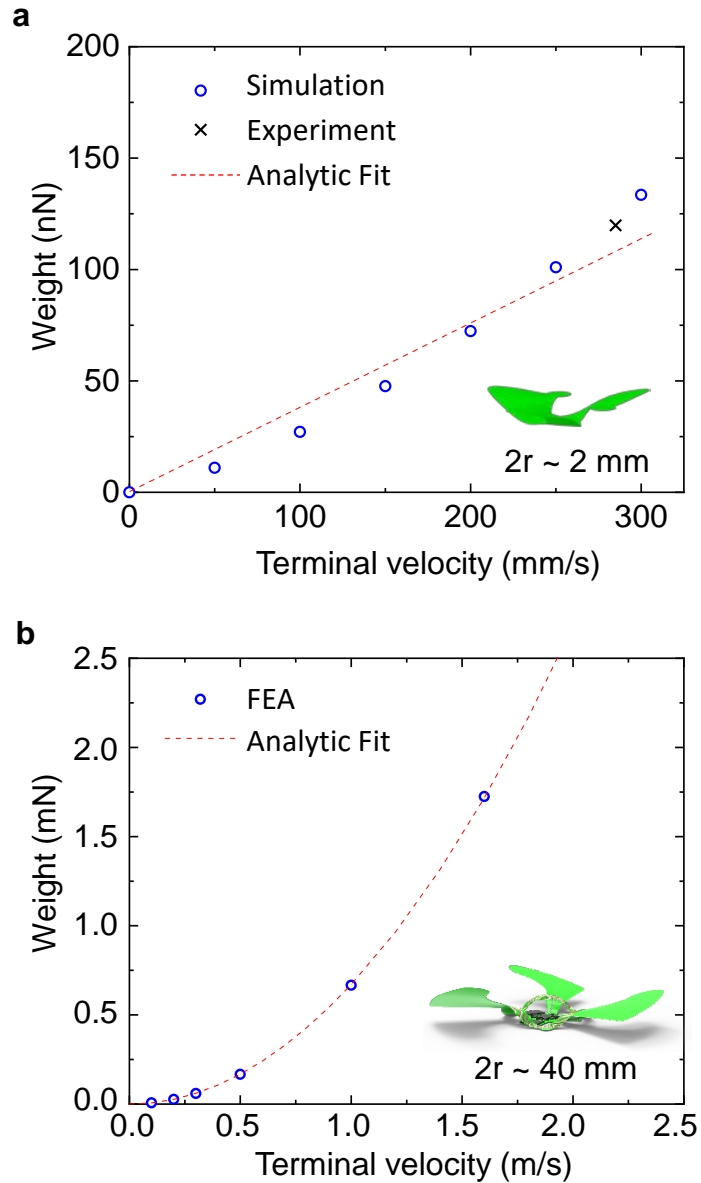

**Figure S4. Relation between flier weight and terminal falling velocity.** (a) Plot that indicates a nearly linear relationship between weight and terminal velocity for a mesoflier with small Reynolds number ( $Re \sim 40$ ). (b) Plot that indicates an approximately parabolic relationship between weight and terminal velocity for a macroflier with large Reynolds number ( $Re \sim 3000$ ).

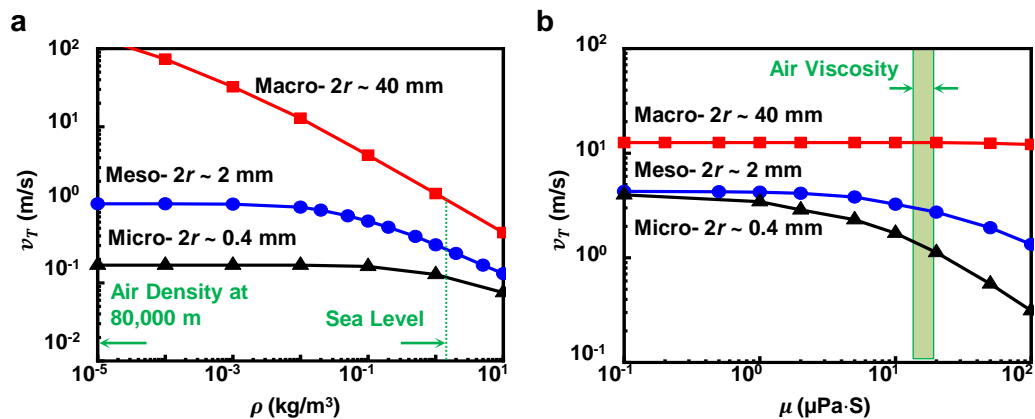

**Figure S5. Effect of air properties.** (a) Density and (b) Dynamic viscosity on the terminal velocity of multi-scale fliers.

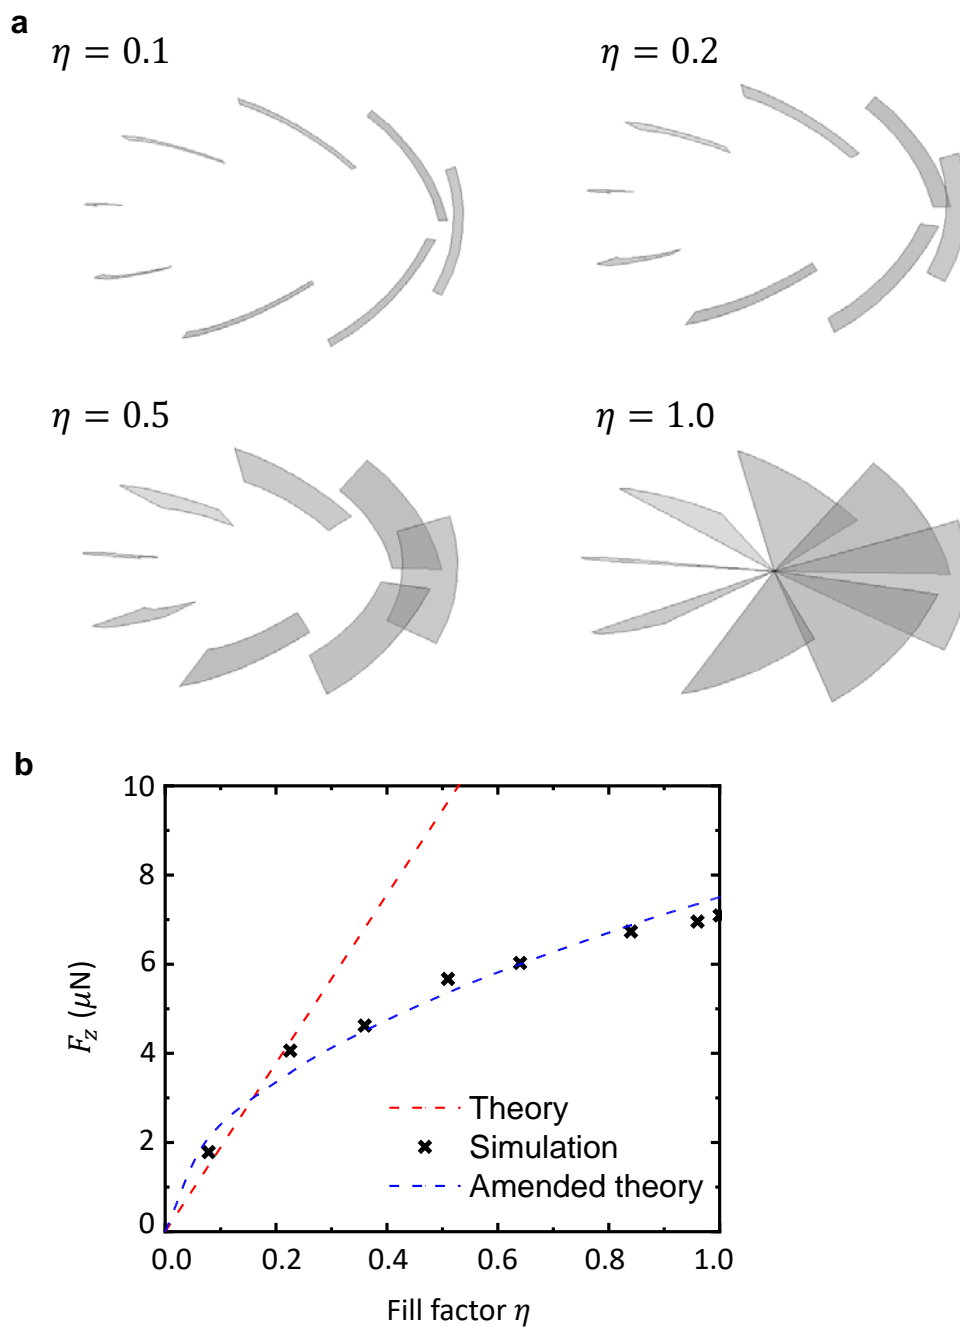

**Figure S6. Amended dependence of the vertical-direction drag force of a 3D mesoflier on the fill factor at small Reynolds number ( $\text{Re} \sim 40$ ).** (a) Schematic diagram of the simplified mesoflier model with various fill factors. (b) Weight to terminal velocity ratio versus fill factor for a mesoflier at small Reynolds number.

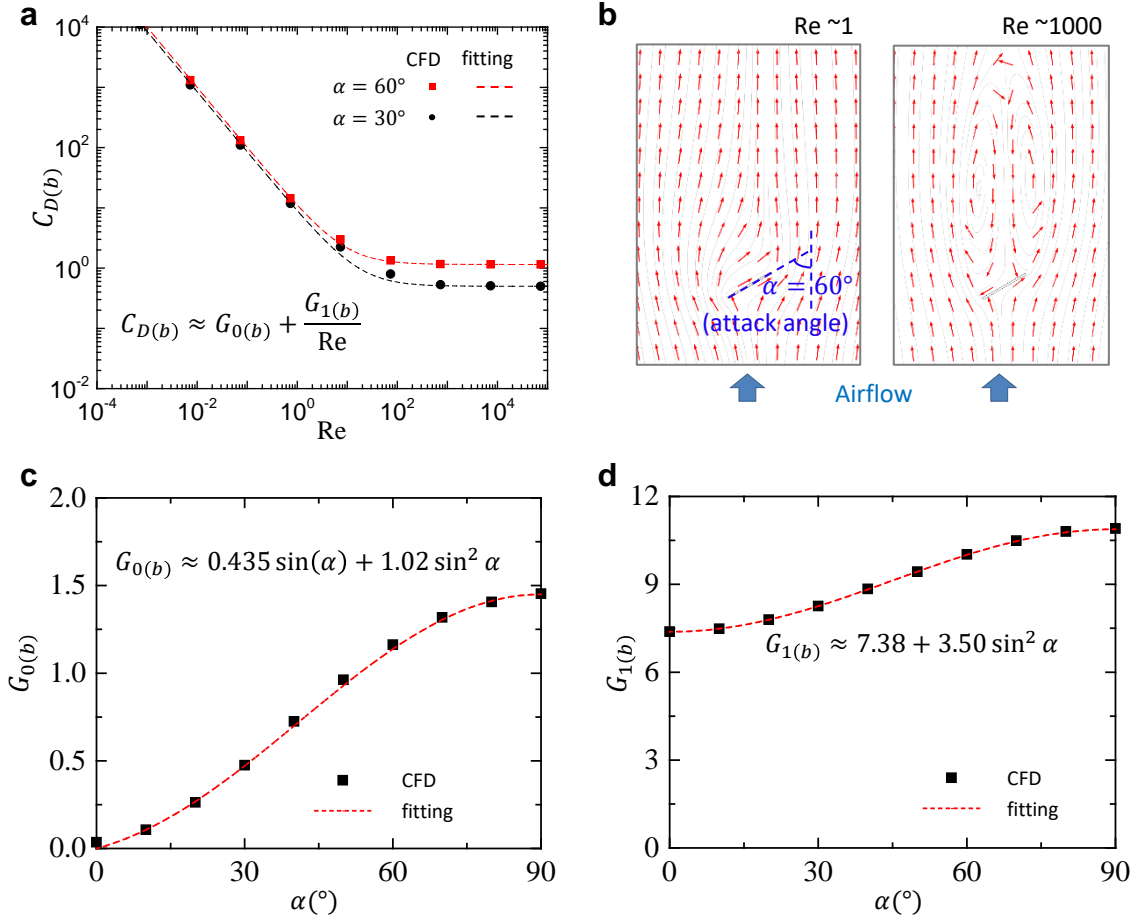

**Figure S7. Aerodynamic properties of 2D flat airfoil (cross-section of blade) for various attack angles.** (a) Drag coefficient of the 2D airfoil versus the Reynolds number. CFD results are fitted by  $C_{D(b)} \approx G_{0(b)} + \frac{G_{1(b)}}{Re}$ , that  $(G_{0(b)}, G_{1(b)}) = (0.50, 8.3)$  for  $\alpha = 30^\circ$  and  $(G_{0(b)}, G_{1(b)}) = (1.15, 10)$  for  $\alpha = 60^\circ$ . (b) Stream and quiver plot for the flow field around a flat airfoil of attack angle  $\alpha = 60^\circ$ , for  $Re \sim 1$  and 1000, respectively. CFD results of (c)  $G_{0(b)}$  and (d)  $G_{1(b)}$  of the 2D airfoil versus the attack angle, as analytically fitted by  $G_{0(b)} \approx 0.435 \sin(\alpha) + 1.02 \sin^2 \alpha$  and  $G_{1(b)} \approx 7.38 + 3.50 \sin^2 \alpha$ , respectively.

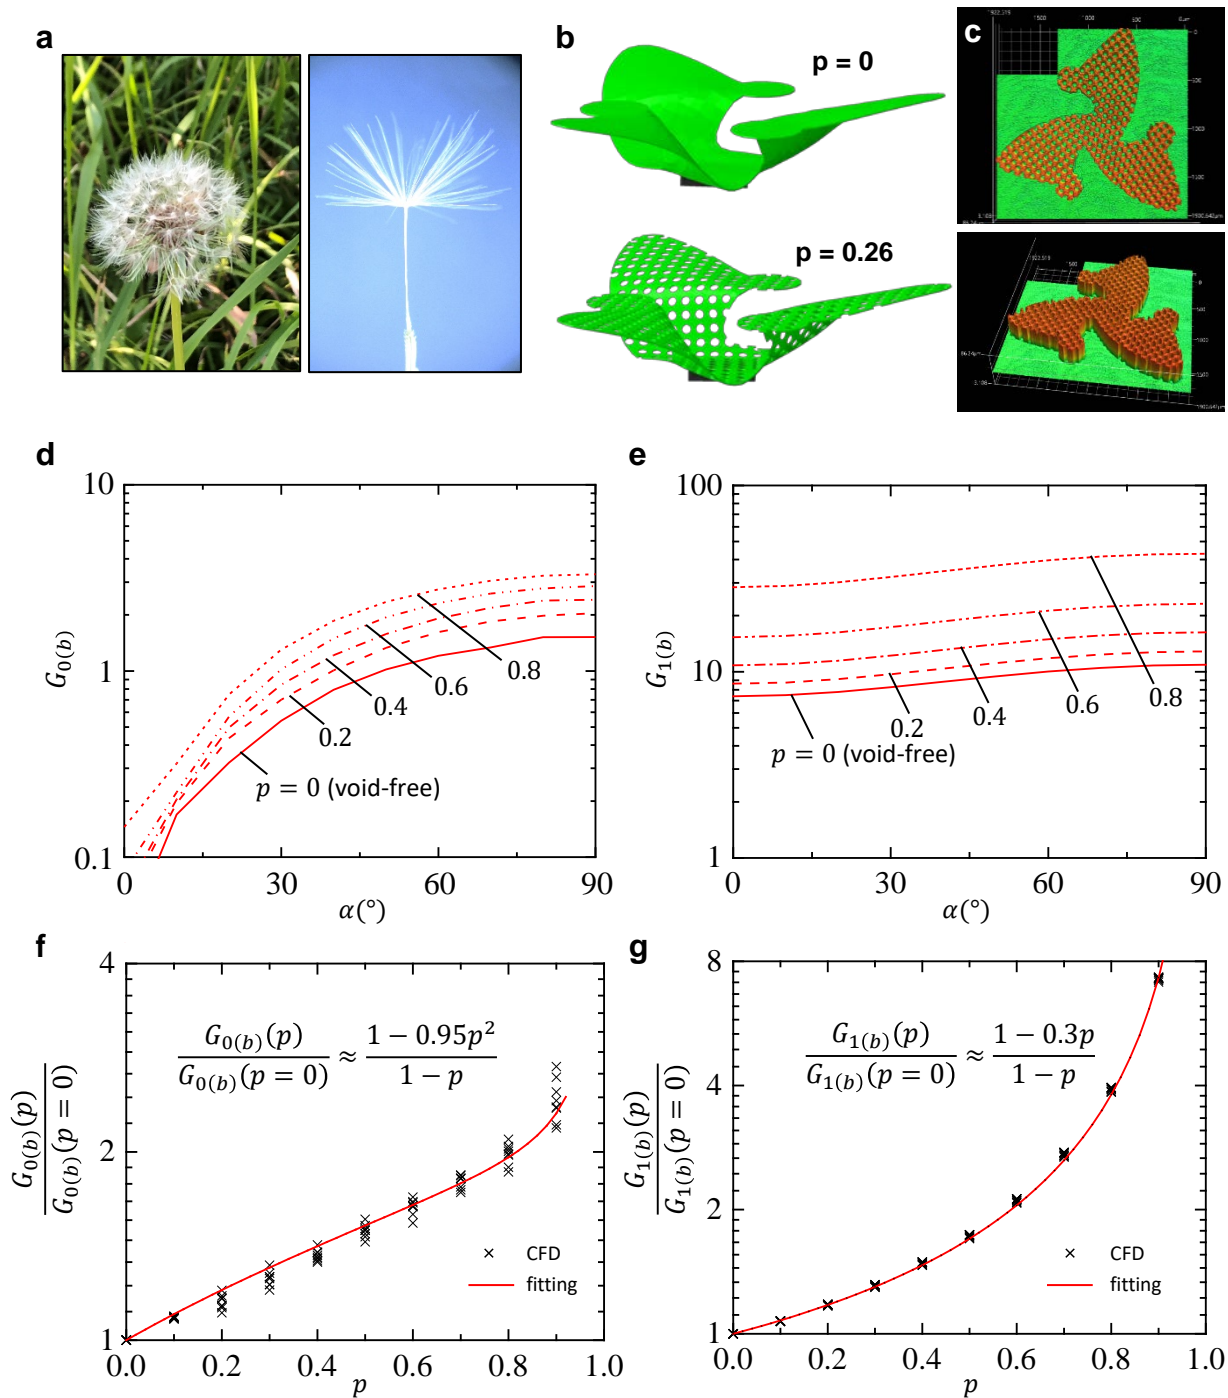

**Figure S8. 3D microflier with porous design.** (a) Inspiration of porosity from nature: optical images of Dandelion seeds and a feather. (b) FE simulated configuration of a 3D void-free microflier ( $p = 0$ ) and a 3D microflier of porosity design ( $p = 0.26$ ). (c) Images of scanned thickness of a 2D precursor for a porous microflier, with top view and perspective view, respectively. (d)  $G_{0(b)}$  and (e)  $G_{1(b)}$  versus the attack angle for various porosities. Normalized (f)  $G_{0(b)}$  and (g)  $G_{1(b)}$  over their void-free values versus porosity, with the CFD values of various  $\alpha \in [0^\circ, 90^\circ]$  and analytic fittings.



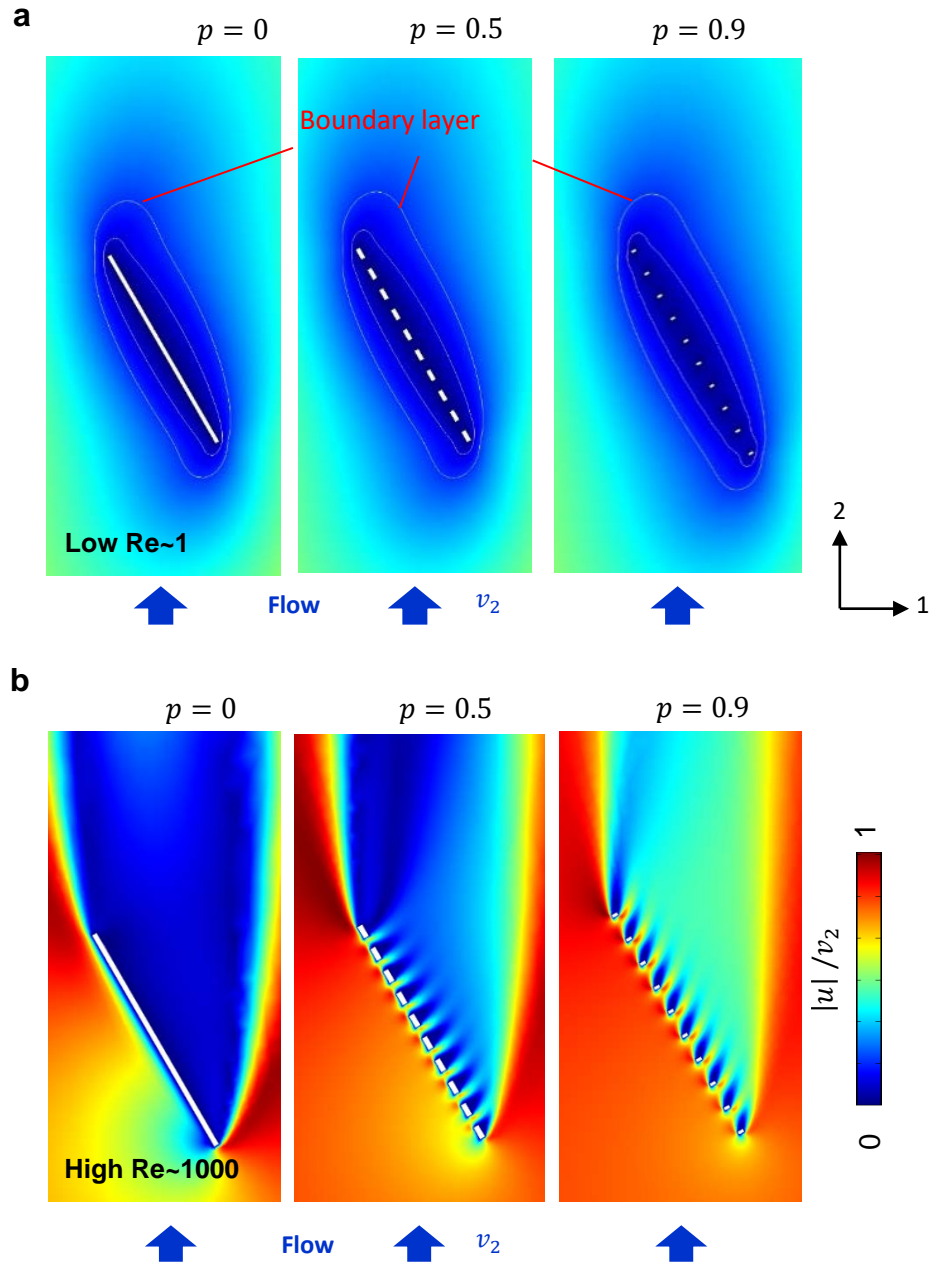

**Figure S9. Velocity fields for airfoil with 3 different porosities ( $p=0$ ,  $0.5$  and  $0.9$ ).** (a) low Re and (b) high Re. The boundary layers at low Re are shown by velocity contours at  $|u|/v_2 = 0.1$ .

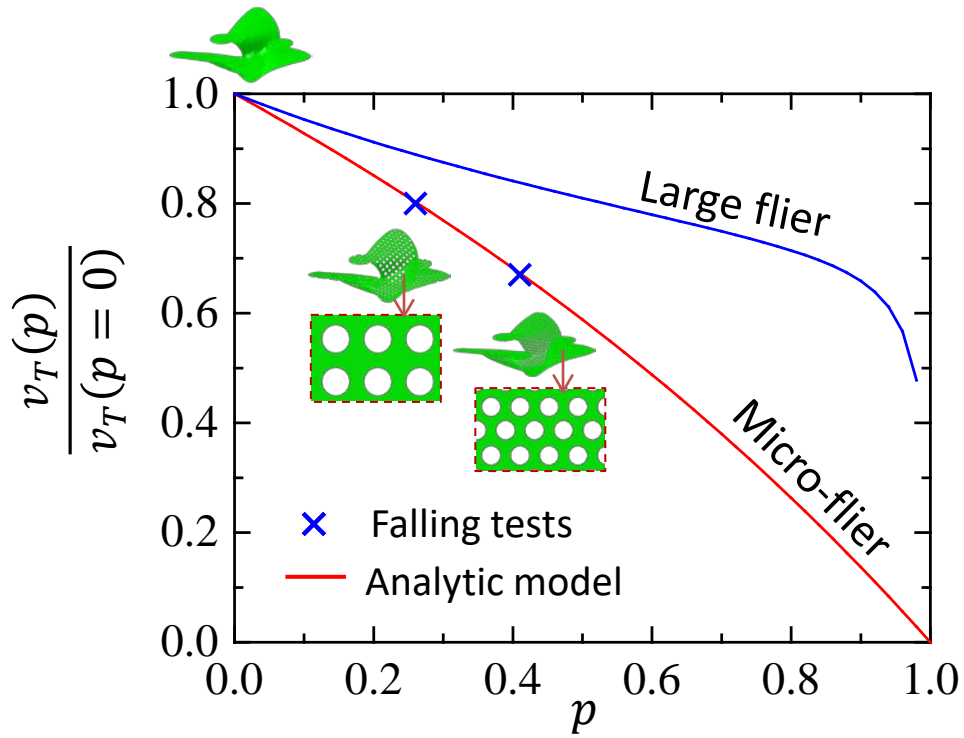

**Figure S10. Terminal velocity versus porosity ( $p$ ) for micro- and macro- scale fliers.** The terminal velocity for the microflier is validated by experimental falling tests (Fig. 3b).

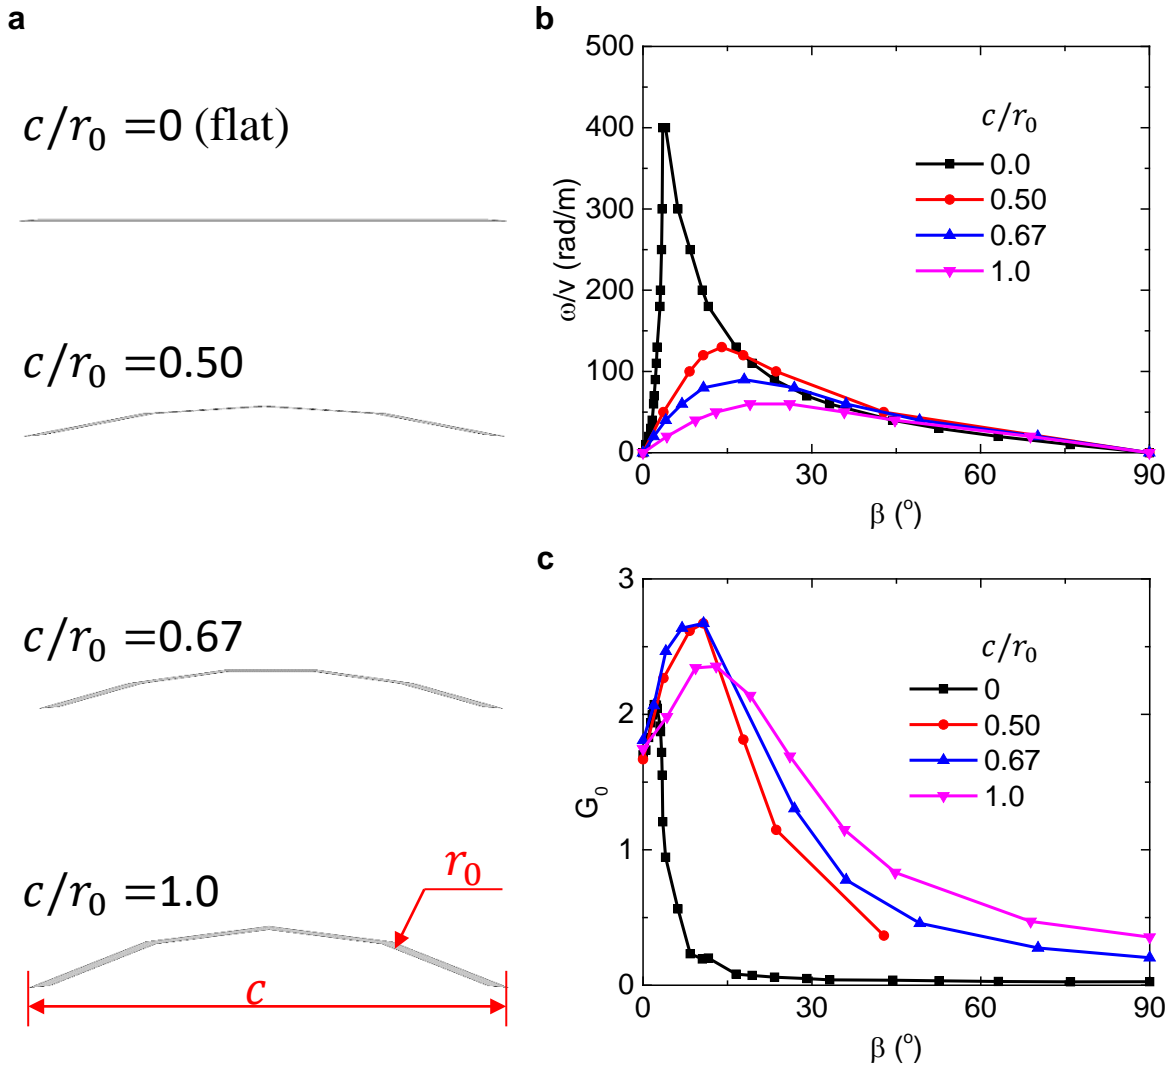

**Figure S11. Effect of airfoil curvature for fliers at large Reynolds numbers.** (a) Scheme of airfoil (cross section of a blade) with different curvatures. (b)  $\omega/v_t$  and (c)  $G_0$  versus blade tilt angle with different airfoil curvatures (from flat to curved), at large Reynolds numbers.

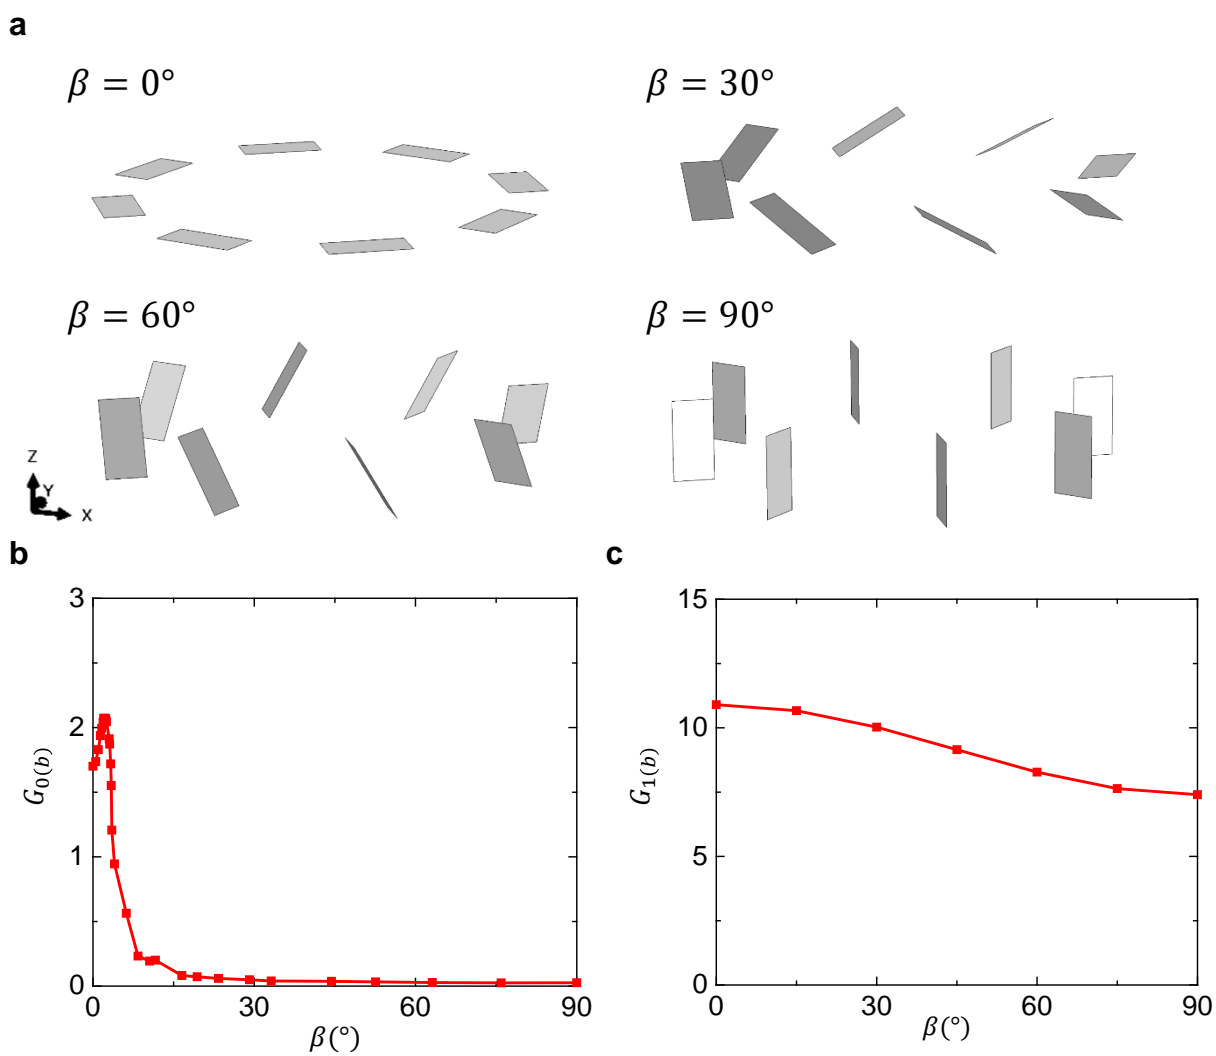

**Figure S12. Effect of tilt angles of blades on  $G_0$  and  $G_1$ .** (a) Scheme of the simplified flier model with different tilt angles ( $\beta$ ). The effect of tilt angle on (b)  $G_0$  and (c)  $G_1$ .

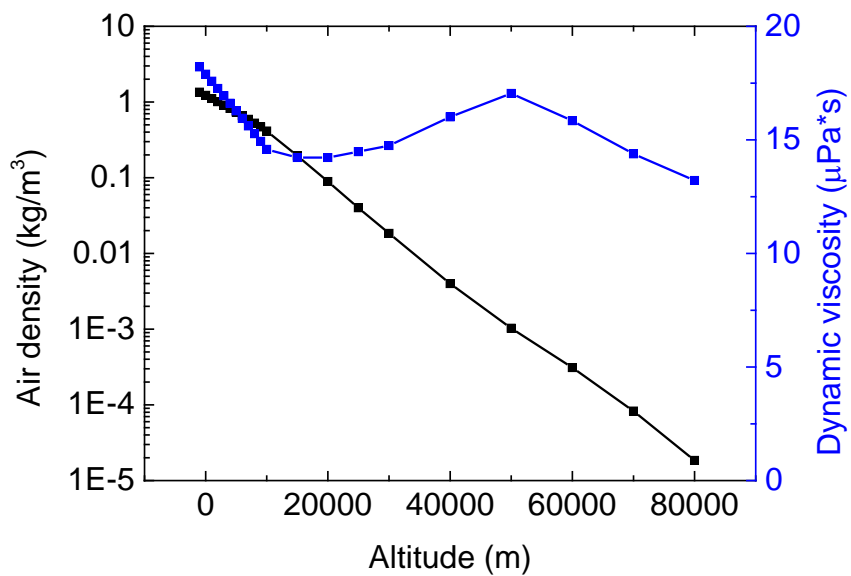

**Figure S13. Effect of air properties.** Air properties (density and dynamic viscosity) of US standard atmosphere at altitudes ranging from 0 to 80,000 m.

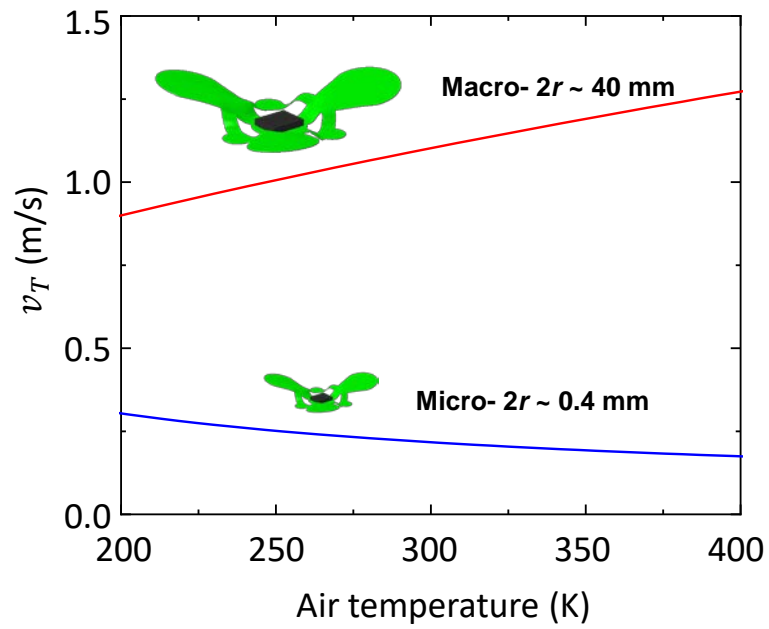

**Figure S14. Effect of air properties.** Effect of air temperature on terminal velocity.

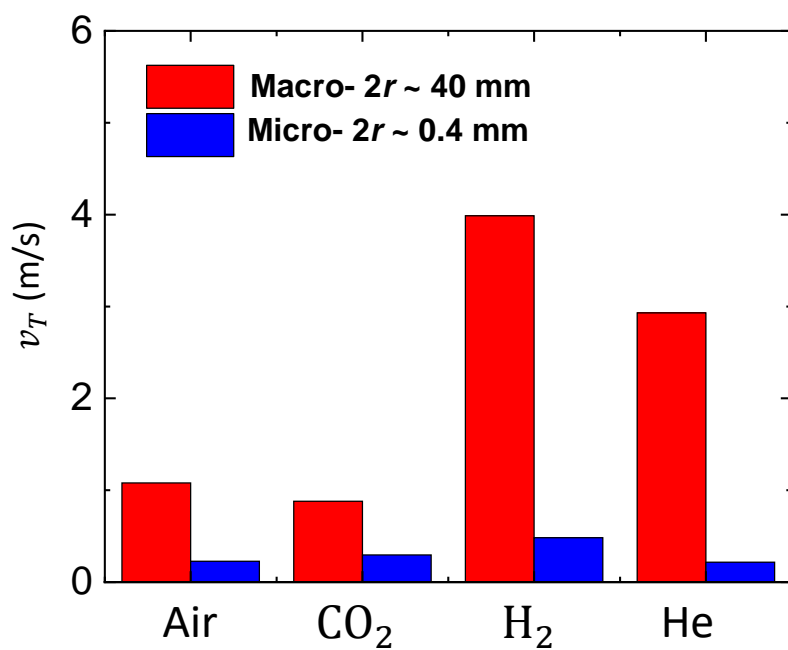

|                                    |       |       |        |        |
|------------------------------------|-------|-------|--------|--------|
| $\rho(\text{kg/m}^3)$              | 1.225 | 1.842 | 0.0899 | 0.1664 |
| $\mu(\mu\text{Pa} \cdot \text{s})$ | 17.89 | 13.70 | 8.40   | 18.70  |

**Figure S15. Effect of molecular makeup.** Prediction of CFD for small and large fliers falling in different gases.

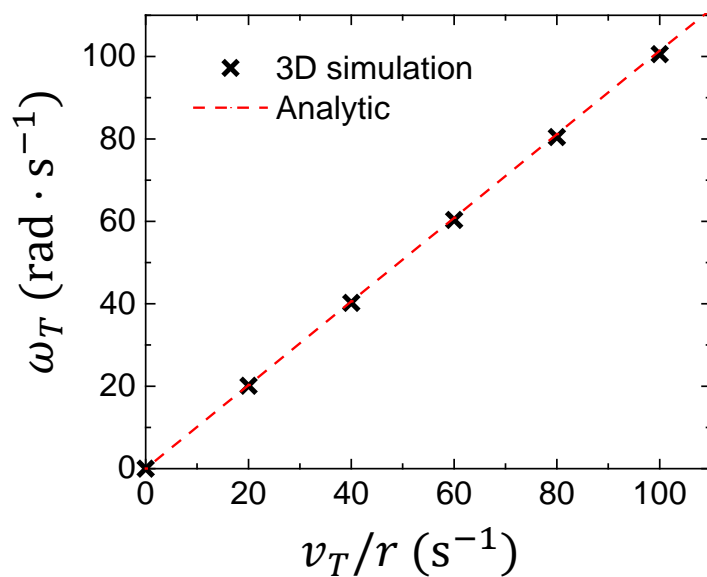

**Figure S16. Scaling law for the terminal rotating speed of a flier.** The rotating speed  $\omega_T$  versus  $v_T/r$ , and the CFD results show a linear relationship, consistent with the analytic model.



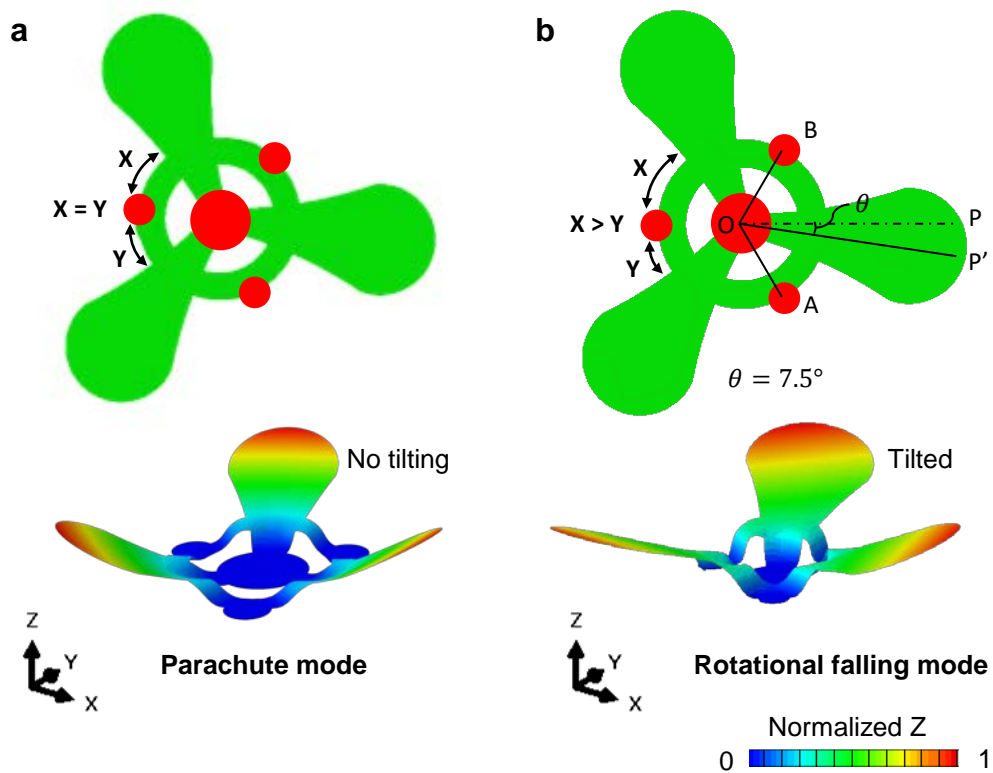

**Figure S17. Mechanical simulation of a 3D microflier [3,H,0.75].** Schematic images of (a) a parachute design where the blades have no rotational tilting, and (b) a rotating flier design with rotationally tilted blades.

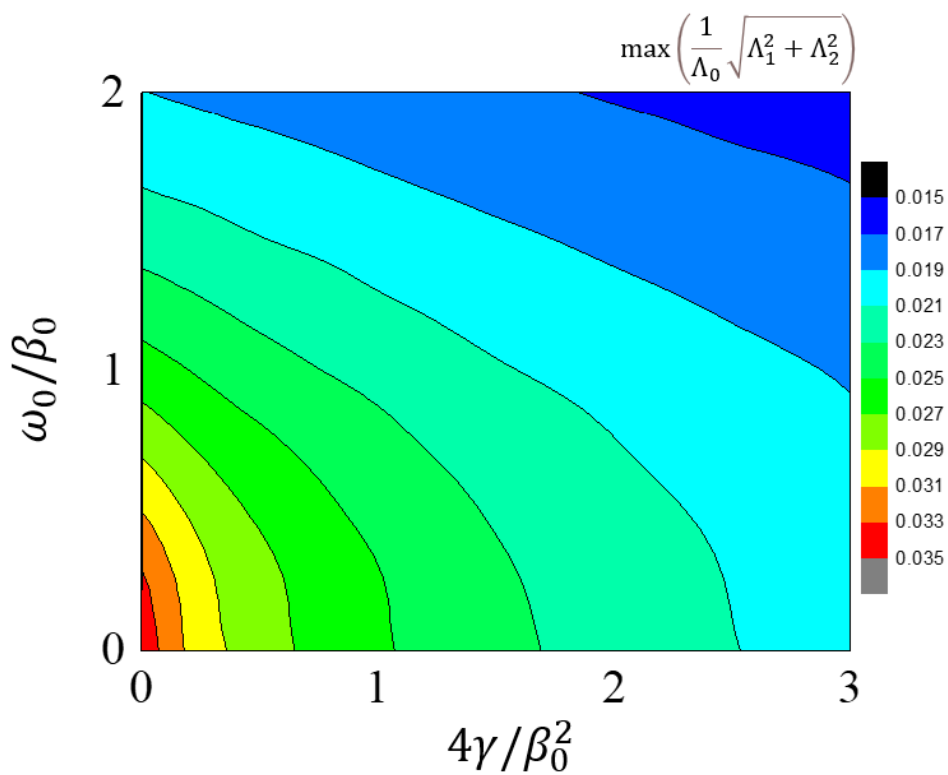

**Figure S18. Maximum perturbed angle.**  $\max\left(\frac{1}{\Lambda_0} \sqrt{\Lambda_1^2 + \Lambda_2^2}\right)$  versus  $\omega_0/\beta_0$  and  $4\gamma/\beta_0^2$ .

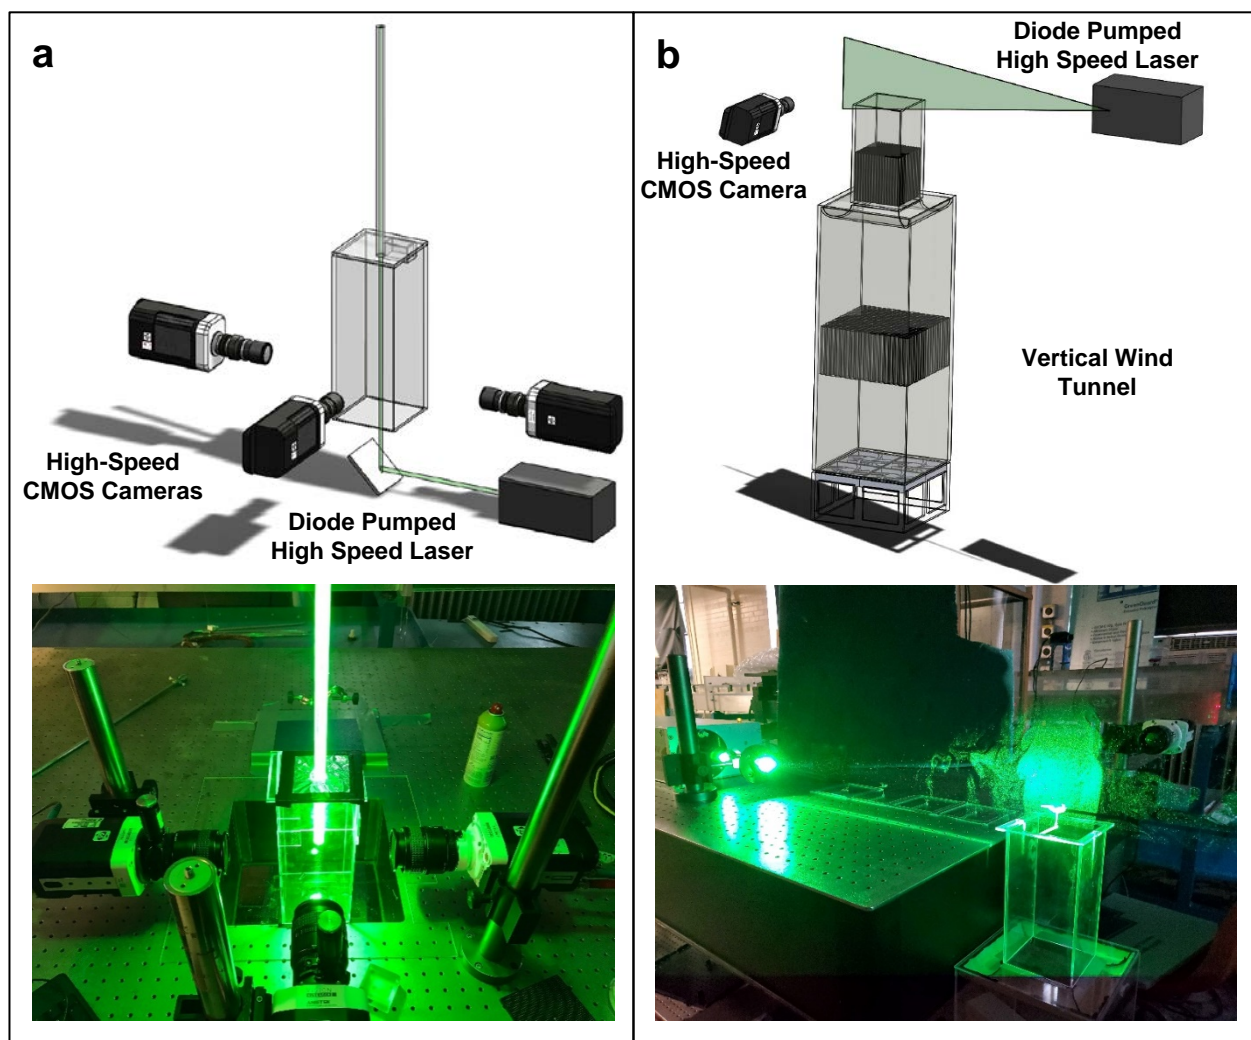

**Figure S19. Experimental setups.** (a) schematic (top) and photograph (bottom) of 3D-PTV experiment on free-falling mesofliers and (b) schematic (top) and photograph (bottom) of high speed PIV experiment on fixed 3D IoT fliers above a wind tunnel.

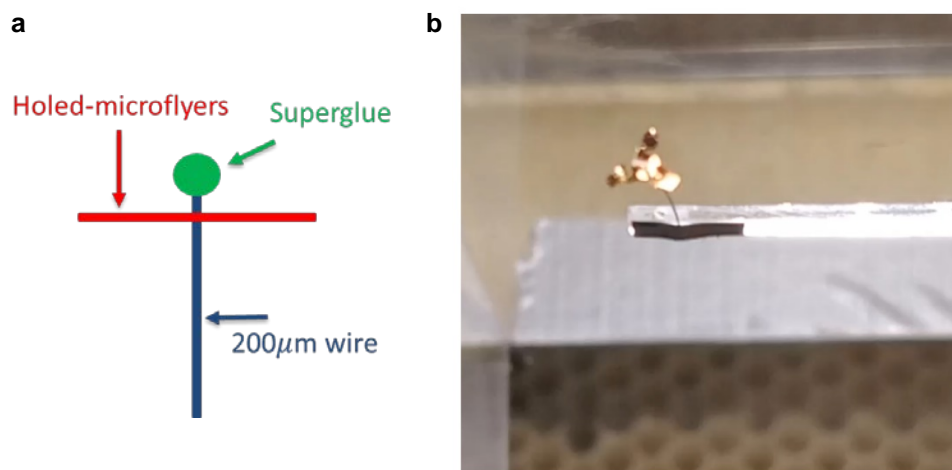

**Figure S20. A fixed 3D macroflier above a wind tunnel.** (a) Schematic diagram of a fixed macroflier, (b) video of comparing 2D (non-rotating) and 3D (rotating) macrofliers with  $r = 1.7$  mm.

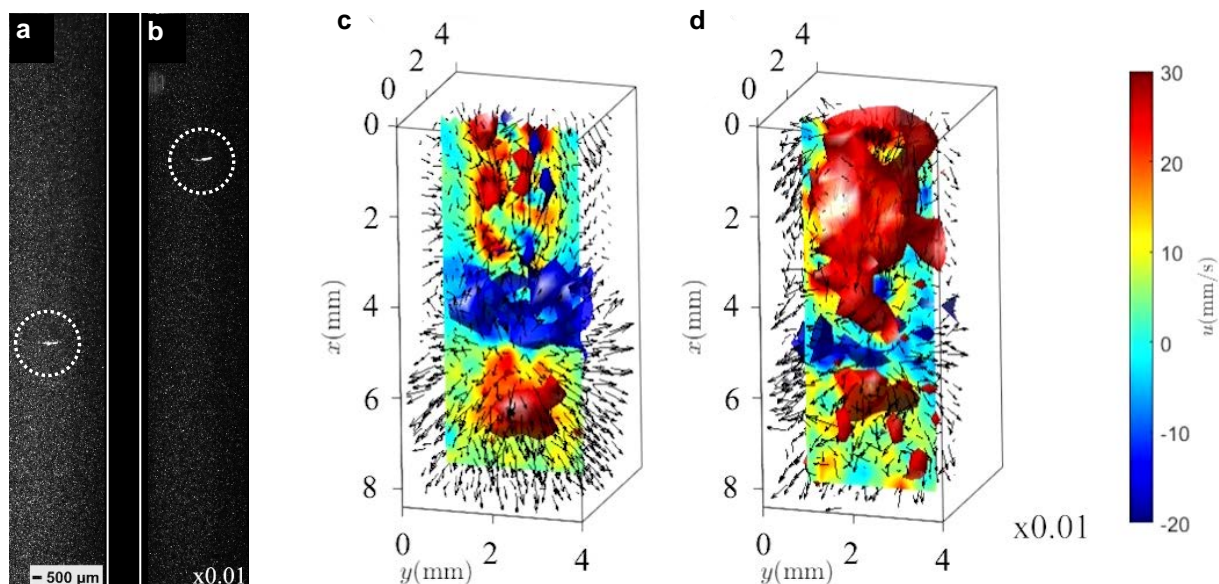

**Figure S21. Free-falling a 2D precursor and 3D mesoflier.** (a) Free-falling 2D precursor, (b) Free-falling 3D mesoflier. Instantaneous 3D flow velocity fields induced by free-falling (c) 2D precursor and (b) 3D mesoflier via 3D-PTV. The color denotes the in-plane 2D vertical velocity along the flier's center plane. Red and blue-sio-surfaces demonstrate iso-values of 15 and -5 mm/s, respectively.

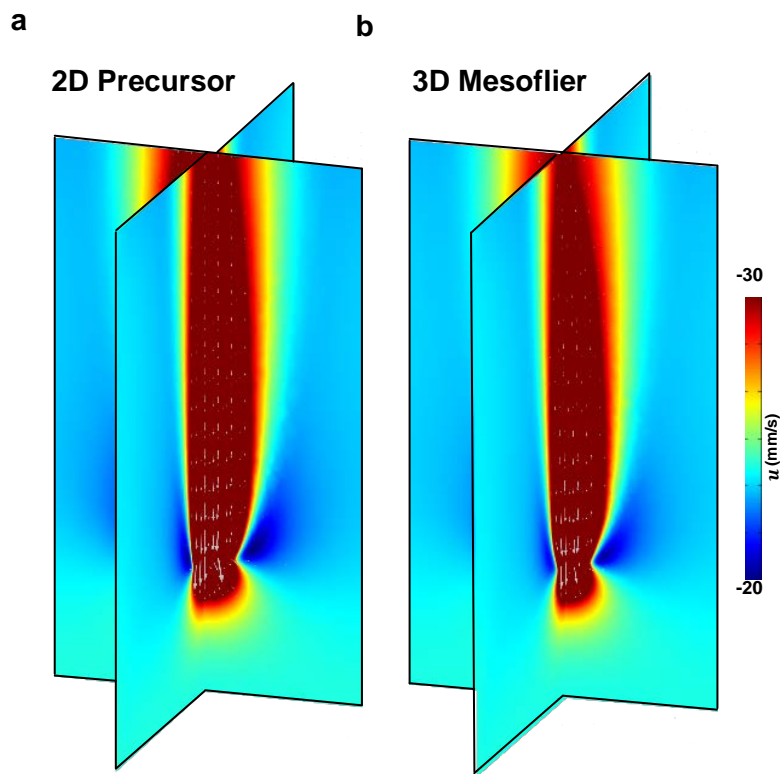

**Figure S22. CFD simulated vertical flow field.** (a) A 2D precursor and (b) 3D mesoflier [3,M,0.4] (Size scale  $2r \sim 2$  mm).

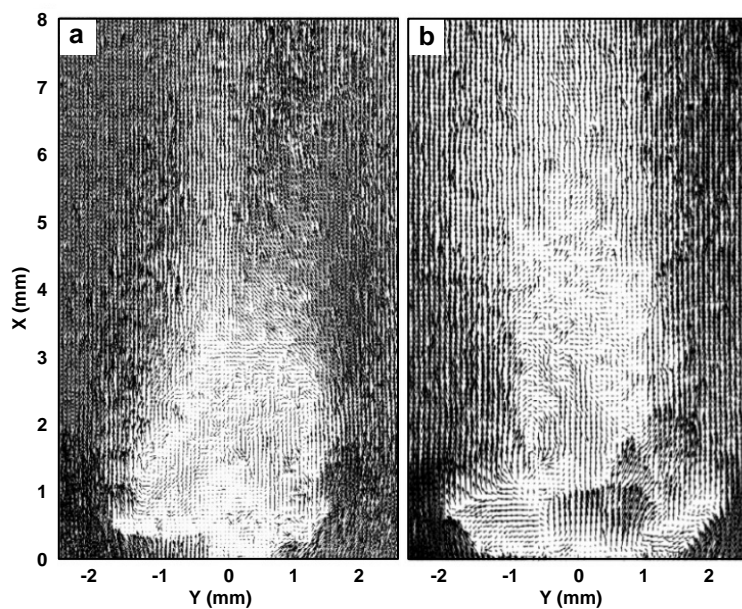

**Figure S23. Experimental results for mesoflier.** Instantaneous velocity fields induced by fixed (a) 2D precursor and (b) 3D mesoflier via PIV above the wind tunnel.

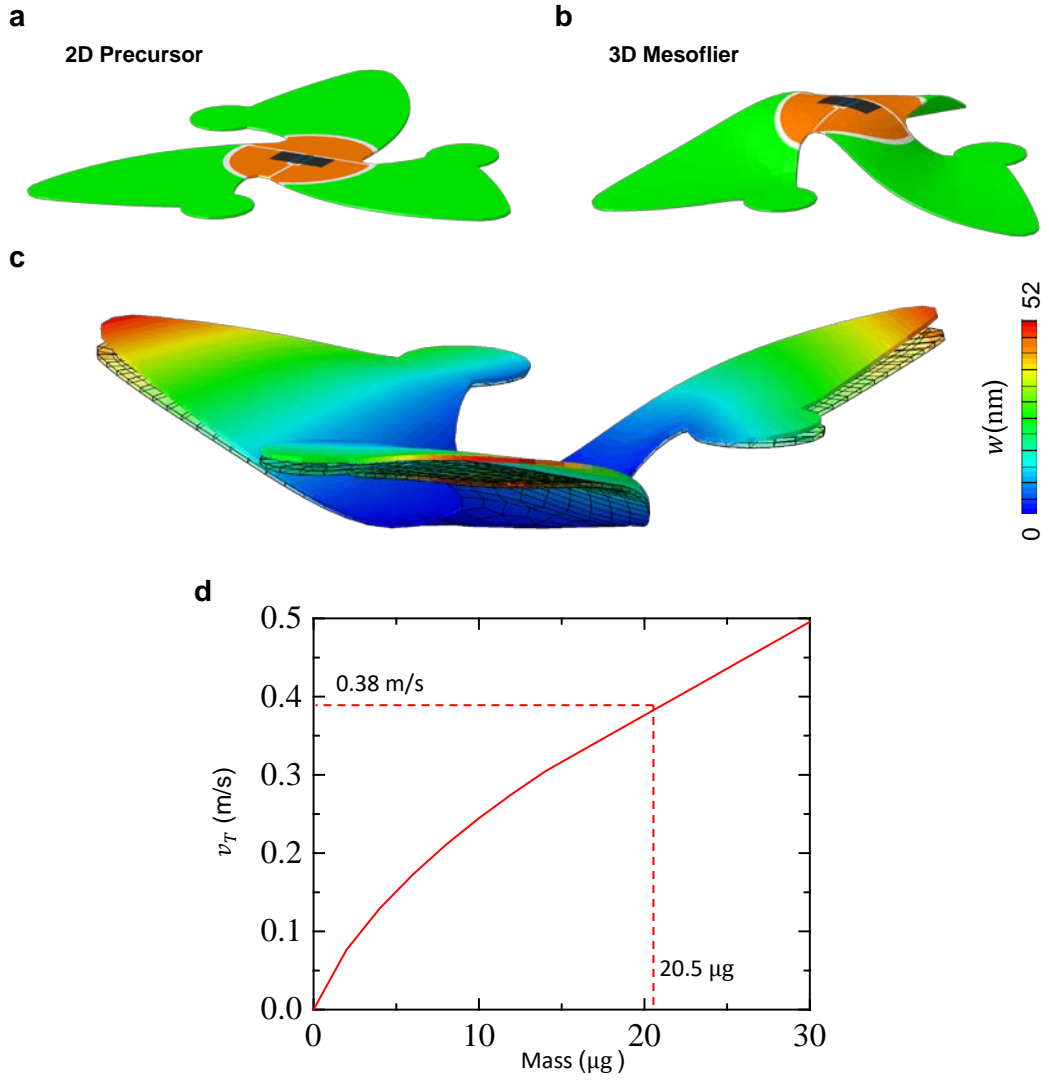

**Figure S24. Simulations for 3D mesofliers with design I [3,M,0.4].** FEA showing (a) 2D precursor and (b) 3D configuration for the mesoflier. (c) Deflection of the 3D mesoflier during free-fall at the terminal velocity. The deflection is magnified by 1000 times. (d) CFD results for the terminal velocity as a function of the mass of the mesoflier.



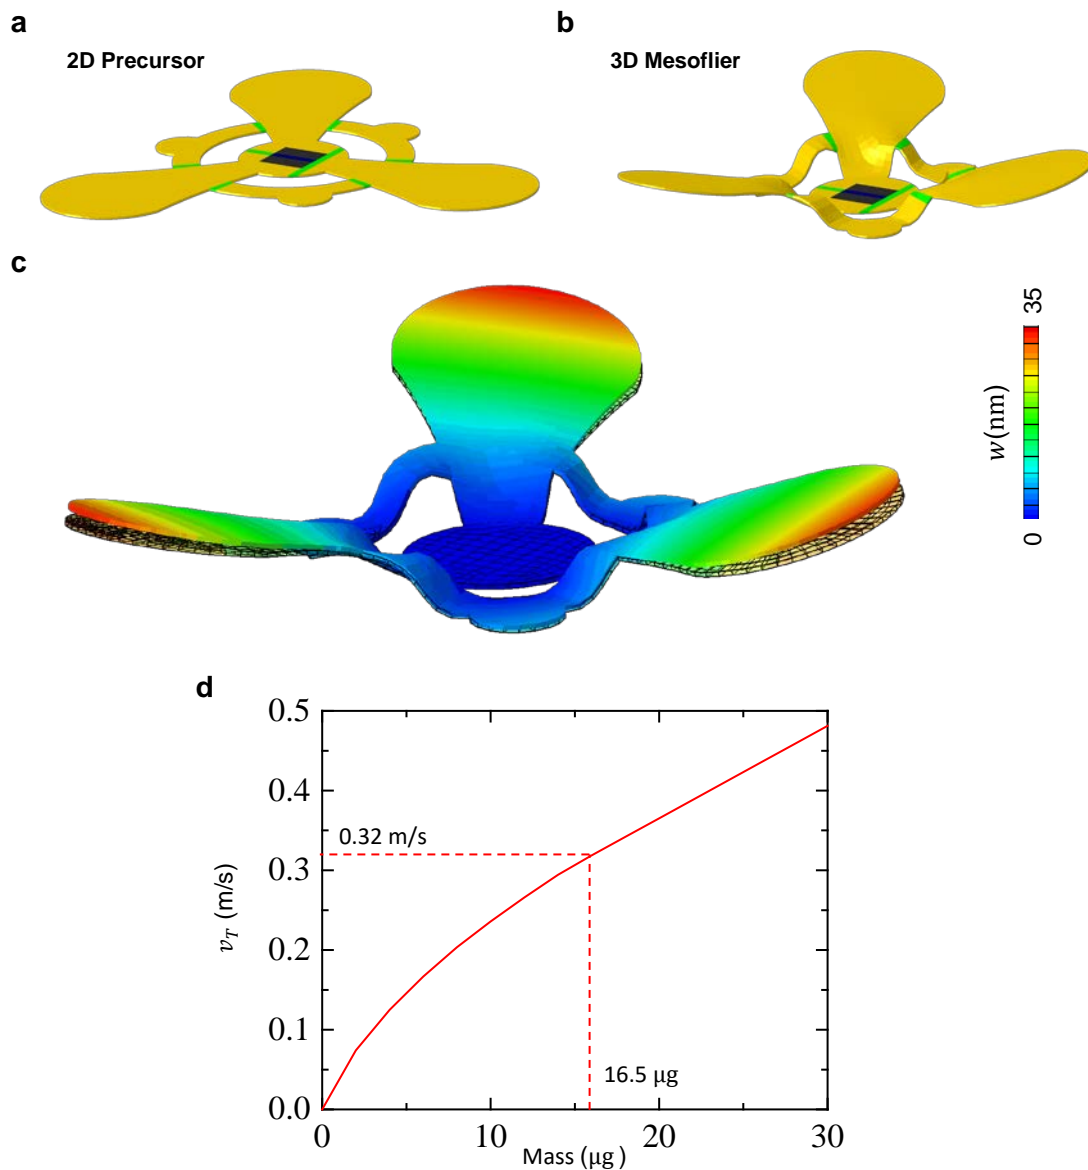

**Figure S25. Simulations for 3D mesofliers with design II [3,H,0.75].** FEA showing (a) 2D precursor and (b) 3D configuration for the mesoflier. (c) Deflection of during free-falling at the terminal velocity. The deflection is magnified by 1000 times. (d) CFD results for the terminal velocity as a function of the mass of the mesoflier.

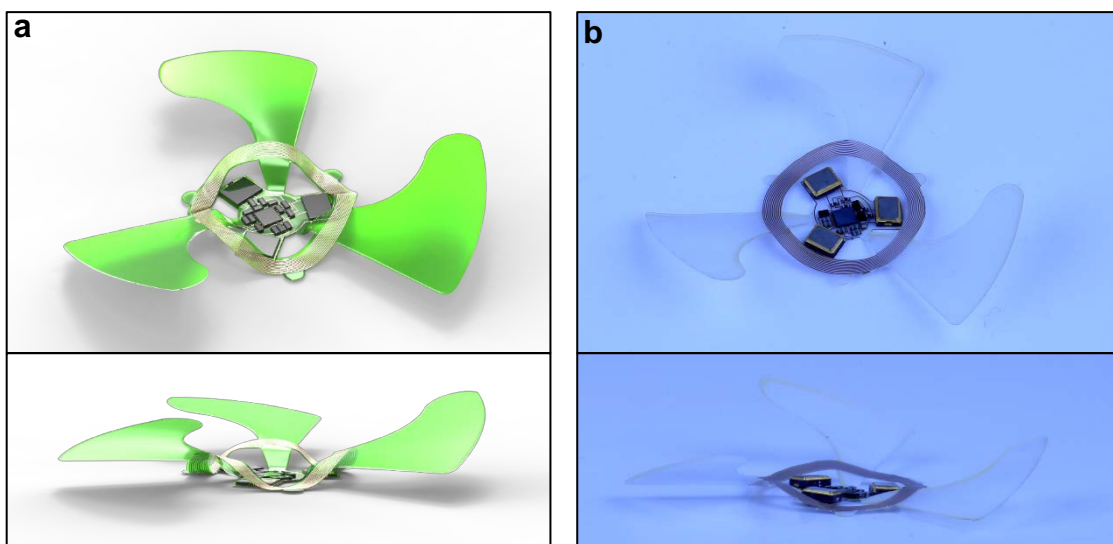

**Figure S26. A 3D IoT macroflyer with another design.** (a) Mechanical simulation results and (b) photographs with a circuit to measure fine dust pollution through the light dosimetry method.

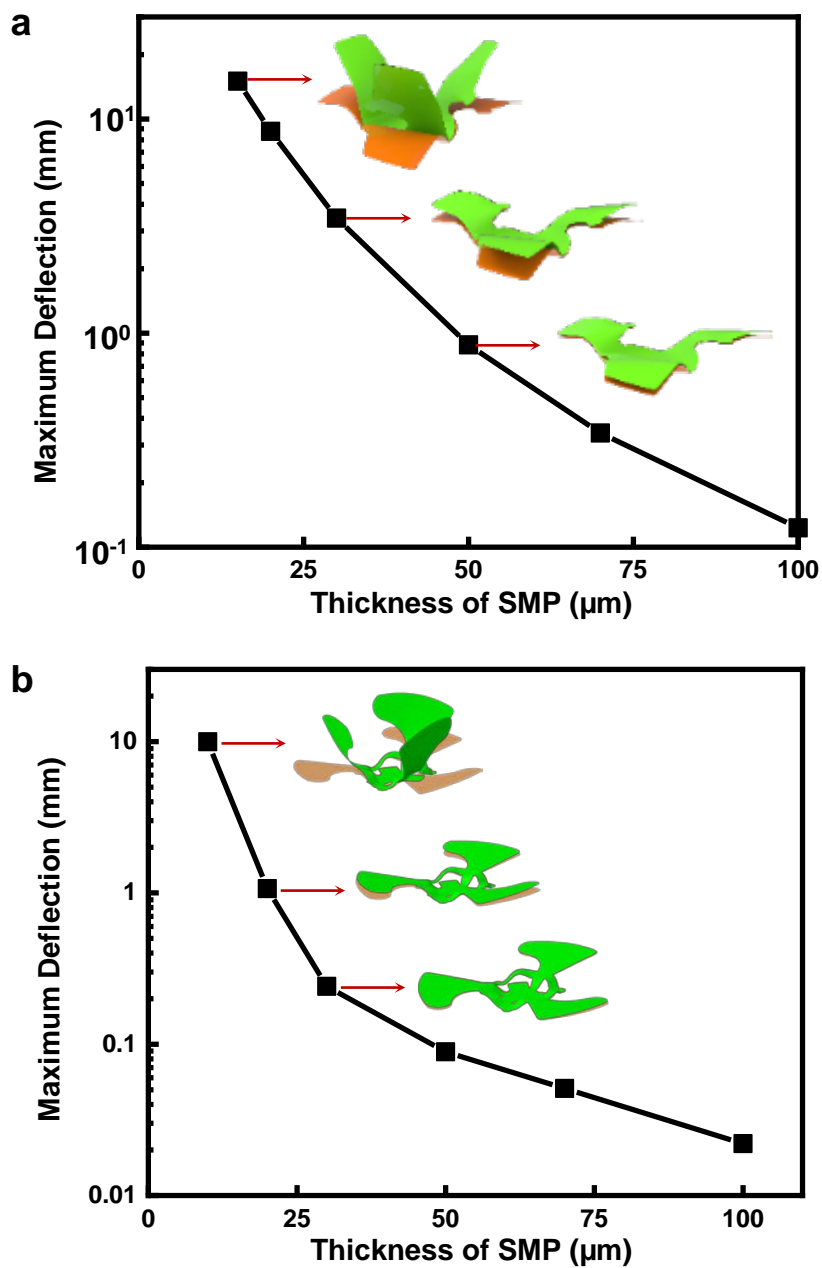

**Figure S27. Effect of thickness on the deflection of 3D IoT macrofliers during falling.** 3D IoT macrofliers with design of (a) Fig. 4e and (b) Fig. S24, respectively.

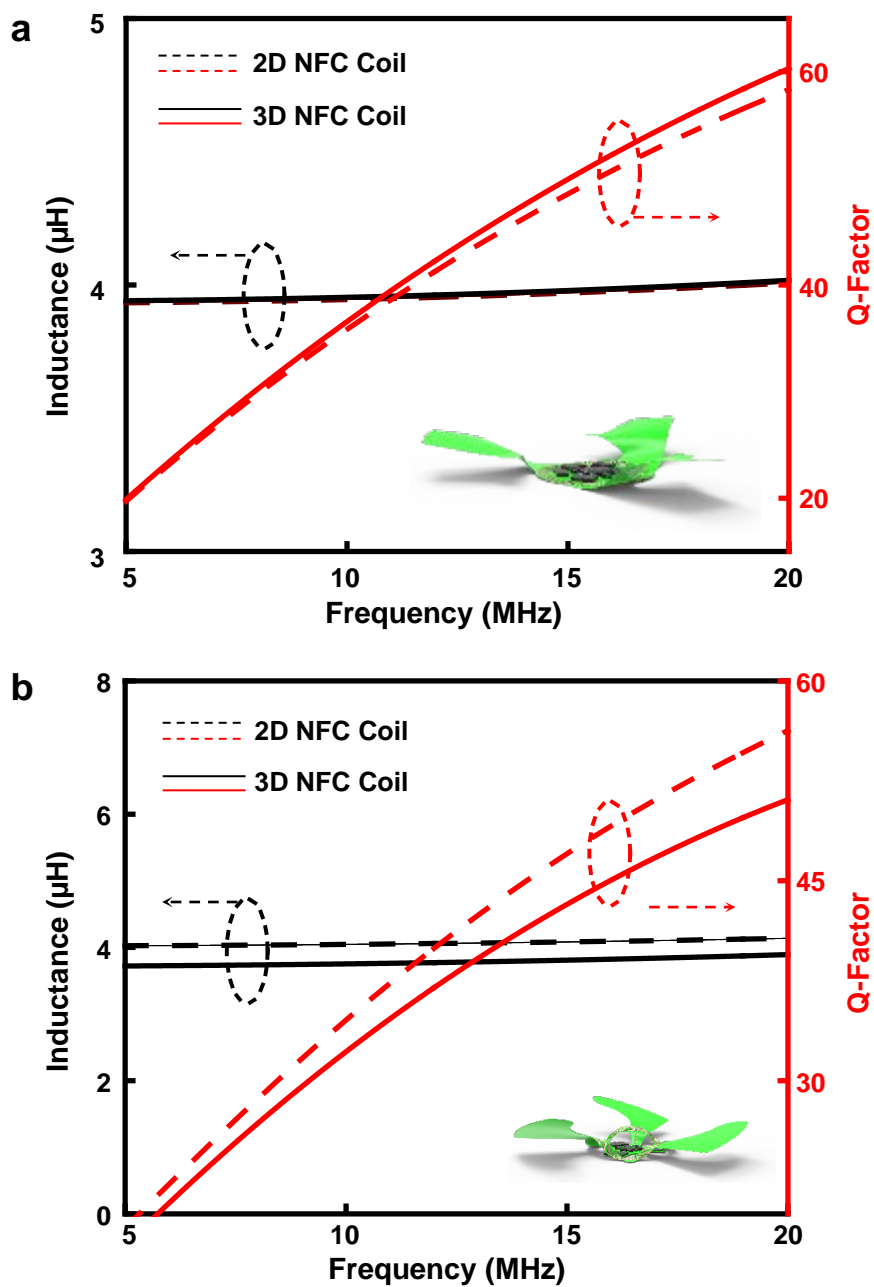

**Figure S28. Electromagnetic simulations.** Inductance and Q-factor for 3D IoT macrofliers with design of (a) Fig. 4e and (b) Fig. S24 for 2D/3D configuration, respectively.

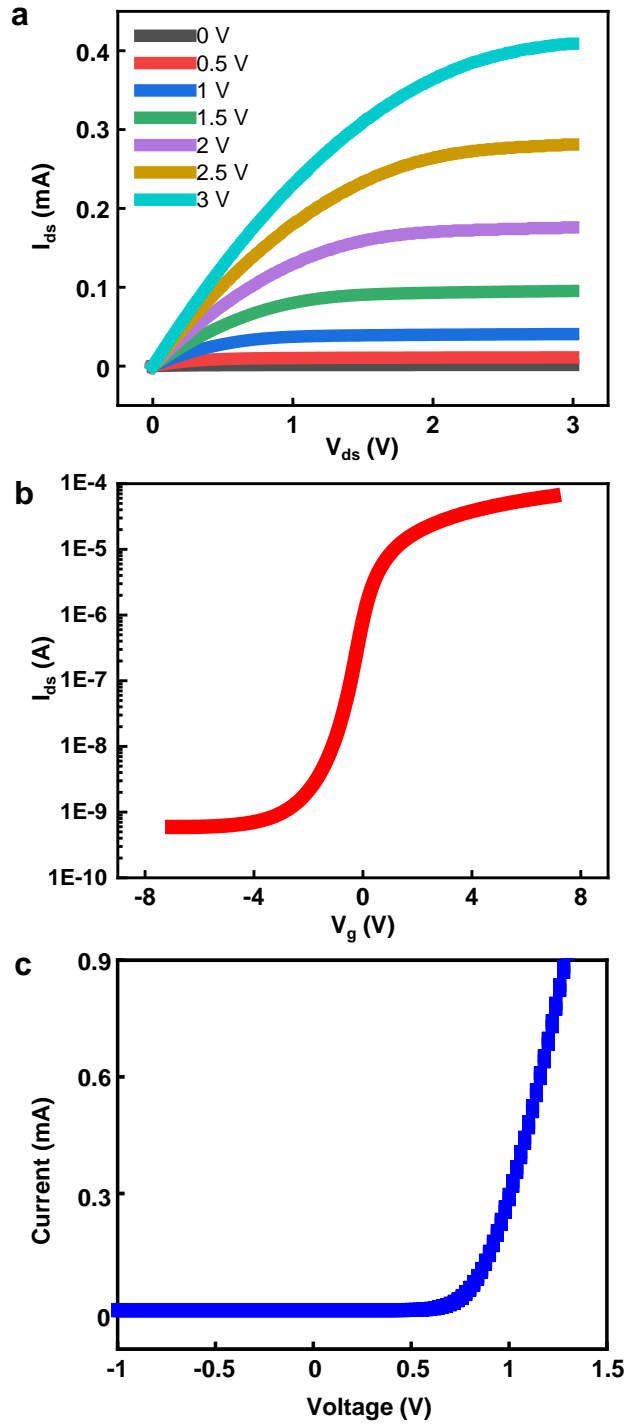

**Figure S29.** The electrical characteristics of silicon NM n-channel transistor (channel width/length = 80/20  $\mu\text{m}$ ) and diode integrated with 3D mesoflriers. (a) Drain current as a function of source/drain voltage for the gate voltages from 0 to 3 V. (b) The log scale transfer curves as a function of gate voltage from -1 to 1.5 V. (c) Current-voltage characteristics of a diode.

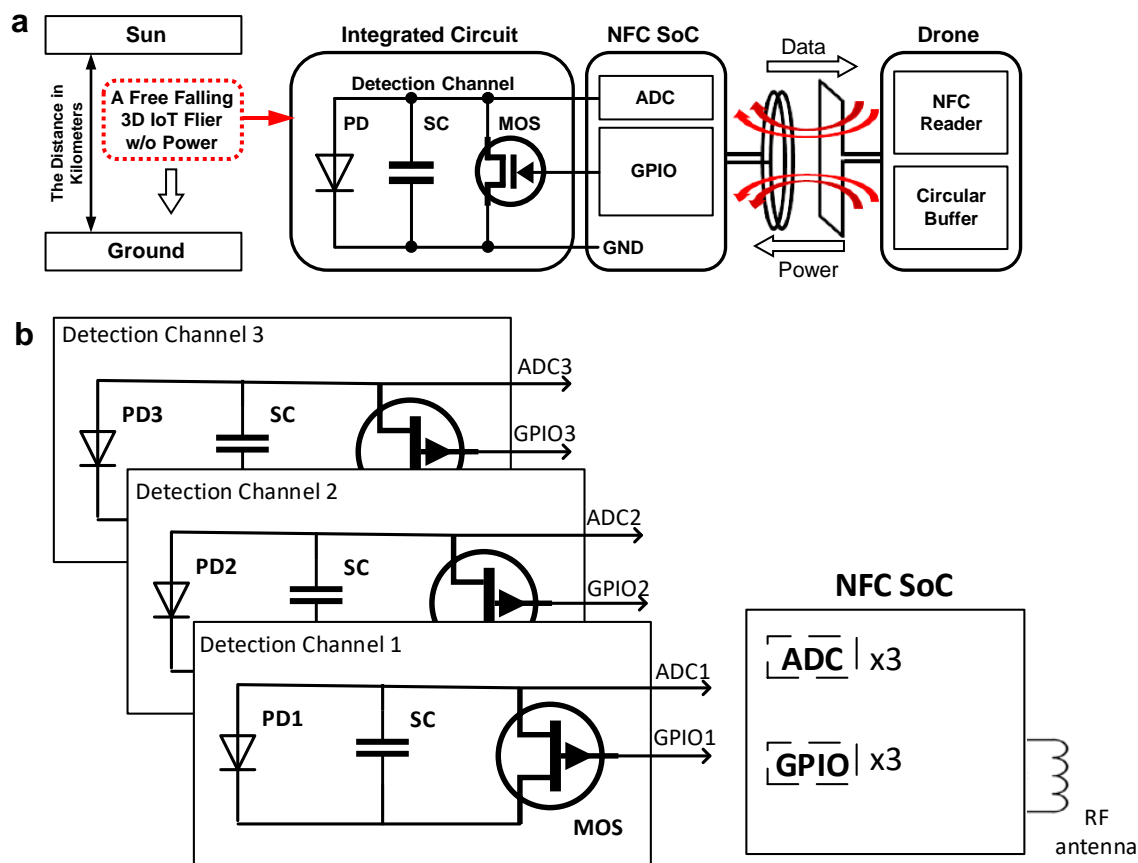

**Figure S30. Circuit schematic of a battery-free, 3-channel dosimeter for fine dust monitoring.** (a) A 3D IoT macroflier and its wireless interface to a drone. (b) Each detection channel consists of a photodiode (PD), a supercapacitor (SC), and a MOSFET (MOS). Upon light exposure, PD continuously generates photocurrent and SC passively stores the accumulated charge. The voltage bias of the SC read via ADC is proportional to the total exposure dose. Simultaneous dosimetry at up to three different wavelengths are possible by PD selection. An Near Field Communication System on Chip (NFC SoC) allows for a battery-free and wireless data transfer and power transmission. Wirelessly activated GPIO supplies 1.5V to the gate of the MOS and triggers SC discharge.

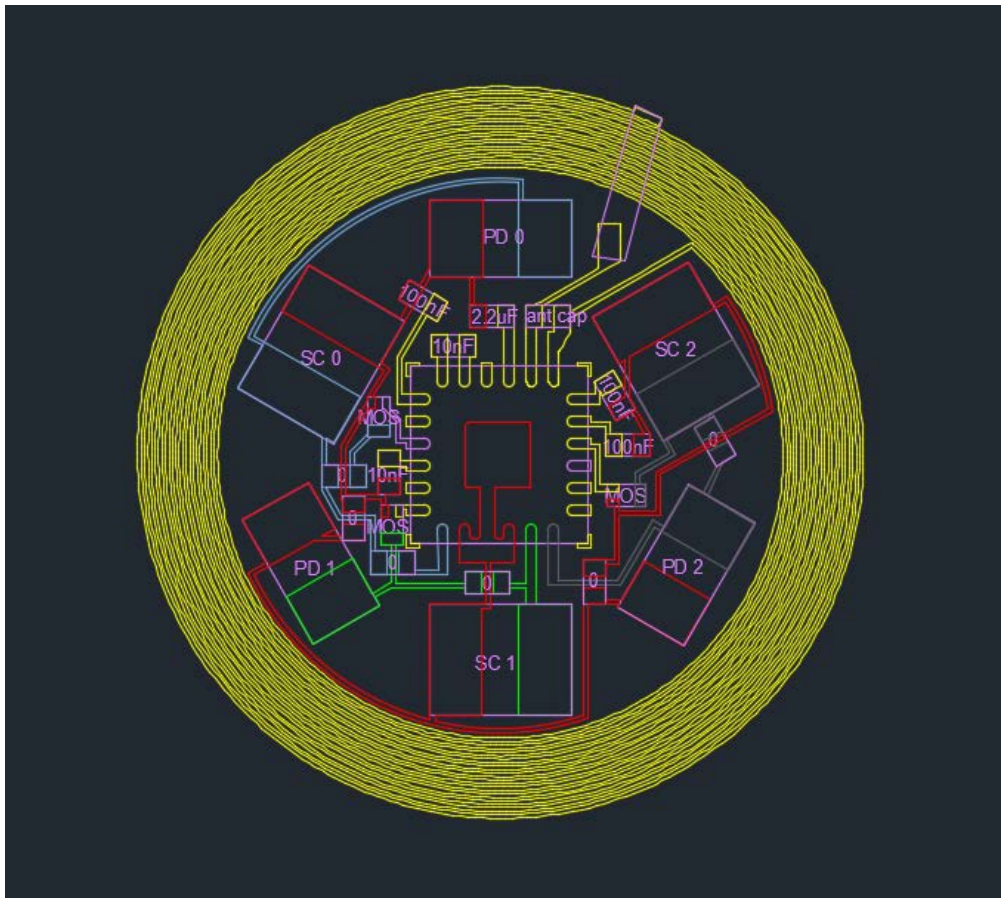

**Figure S31. CAD design.** Electronic components and metal interconnectors for a 3D IoT macroflier.

**Table S1. Electronic components.** The list of a detailed information of electronic circuits for a battery-free, 3-channel dosimeter for fine dust monitoring.

| Item                   | Manufacturer                     | Catalog Number       | Description                                 |
|------------------------|----------------------------------|----------------------|---------------------------------------------|
| <b>NFC Chip</b>        | Texas Instruments                | RF430FRL152HC RGER   | RFID Transponders Sensor Transponder        |
| <b>Photodiode</b>      | Advanced Photonix                | PDB-CD160SM          | Photodiode 850nm 20ns 120° 2-SMD, Gull Wing |
| <b>MOSFET</b>          | Texas Instruments                | CSD17381F4           | MOSFET N-CH 30V 3.1A 0402                   |
| <b>Super-Capacitor</b> | Seiko Instruments                | CPH3225A             | CAP 11MF 3.3V SURFACE MOUNT                 |
| <b>Capacitor 1</b>     | Murata Electronics North America | GRM033R60J22 5ME47D  | CAP CER 2.2UF 6.3V X5R 0201                 |
| <b>Capacitor 2</b>     | TDK Corporation                  | C0603X7R1A103 K030BA | CAP CER 10000PF 10V X7R 0201                |
| <b>Capacitor 3</b>     | TDK Corporation                  | C0603X5R1A104 K030BC | CAP CER 0.1UF 10V X5R 0201                  |



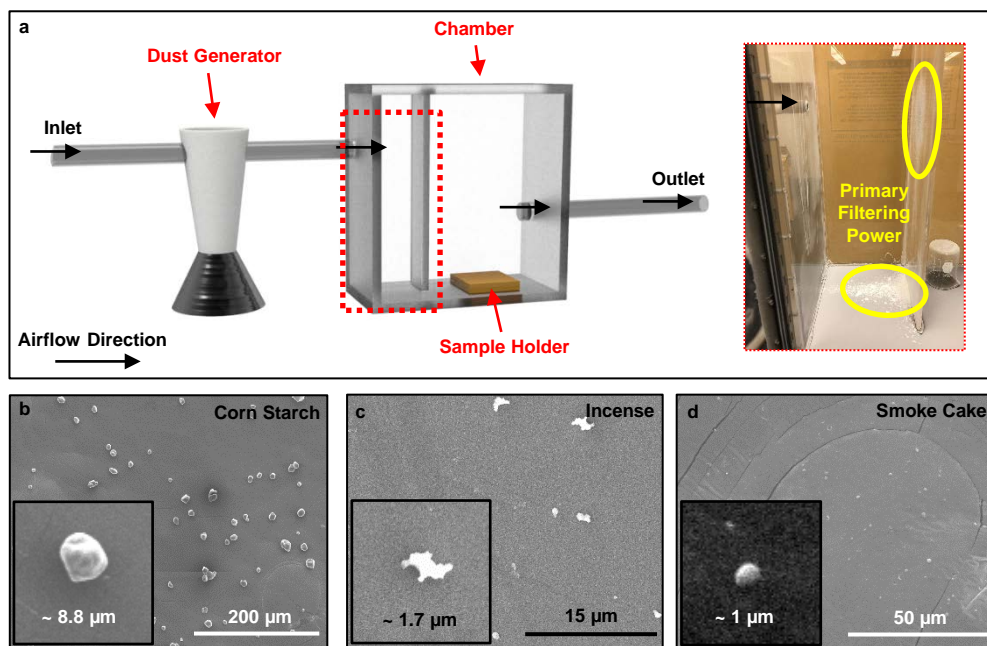

**Figure S32. Experiments for particulate matter (PM).** (a) A dust generation chamber operated with kitchen blenders. SEM images of fine dust generated by (b) corn starches, (c) incenses and (d) smoke cakes.

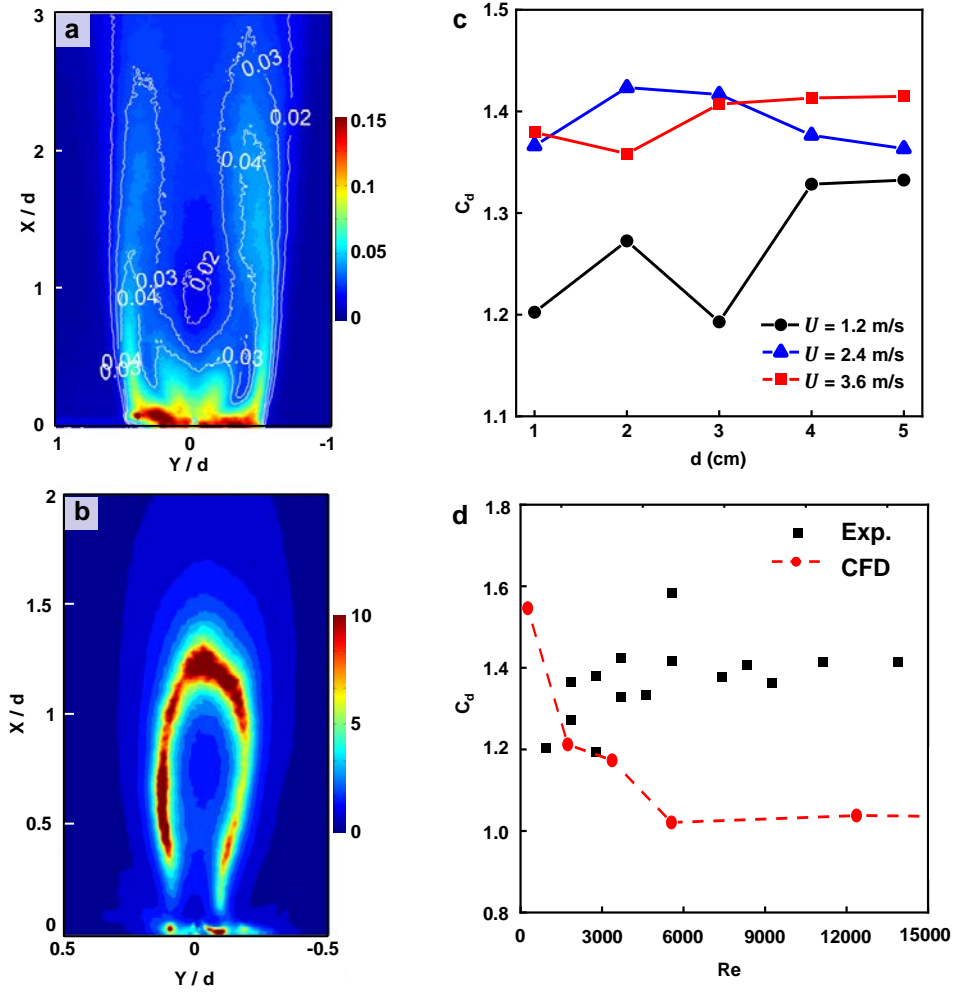

**Figure S33. High-speed PIV measurements for 3D macrofliers.** (a) turbulent Kinetic energy  $TKE = \frac{1}{2} [(\overline{u'})^2 + (\overline{v'})^2] / U^2$ . (b) turbulence intensity  $TI = \sqrt{(\overline{u'})^2 + (\overline{v'})^2} / \sqrt{\overline{u}^2 + \overline{v}^2}$ . (c) drag coefficient,  $C_d$ , calculated from velocity profiles vs diameters,  $d$ . (d)  $C_d$  vs  $Re$ .

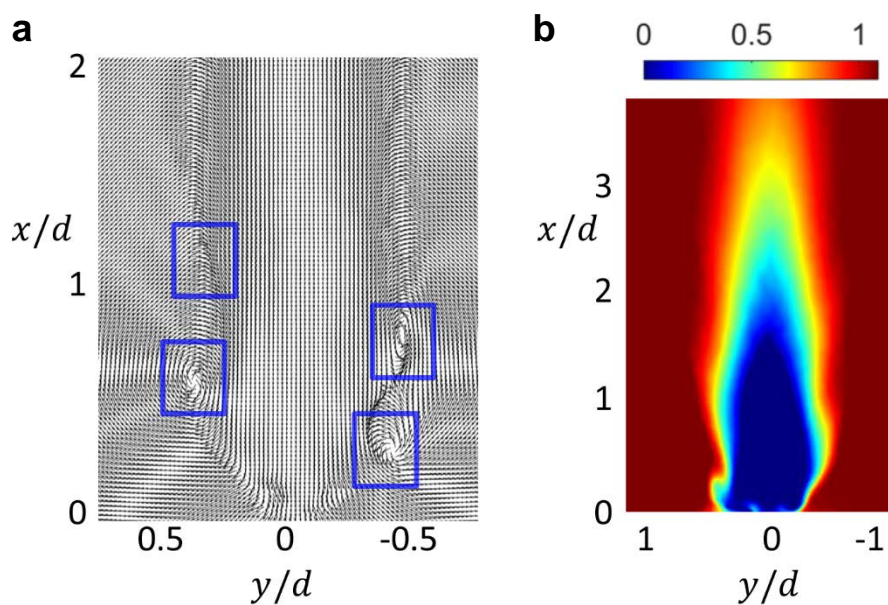

**Figure S34. CFD results for a 3D IoT macroflier.** (a) Instantaneous velocity field. (b) Mean velocity field in the streamwise direction  $u/U$ .

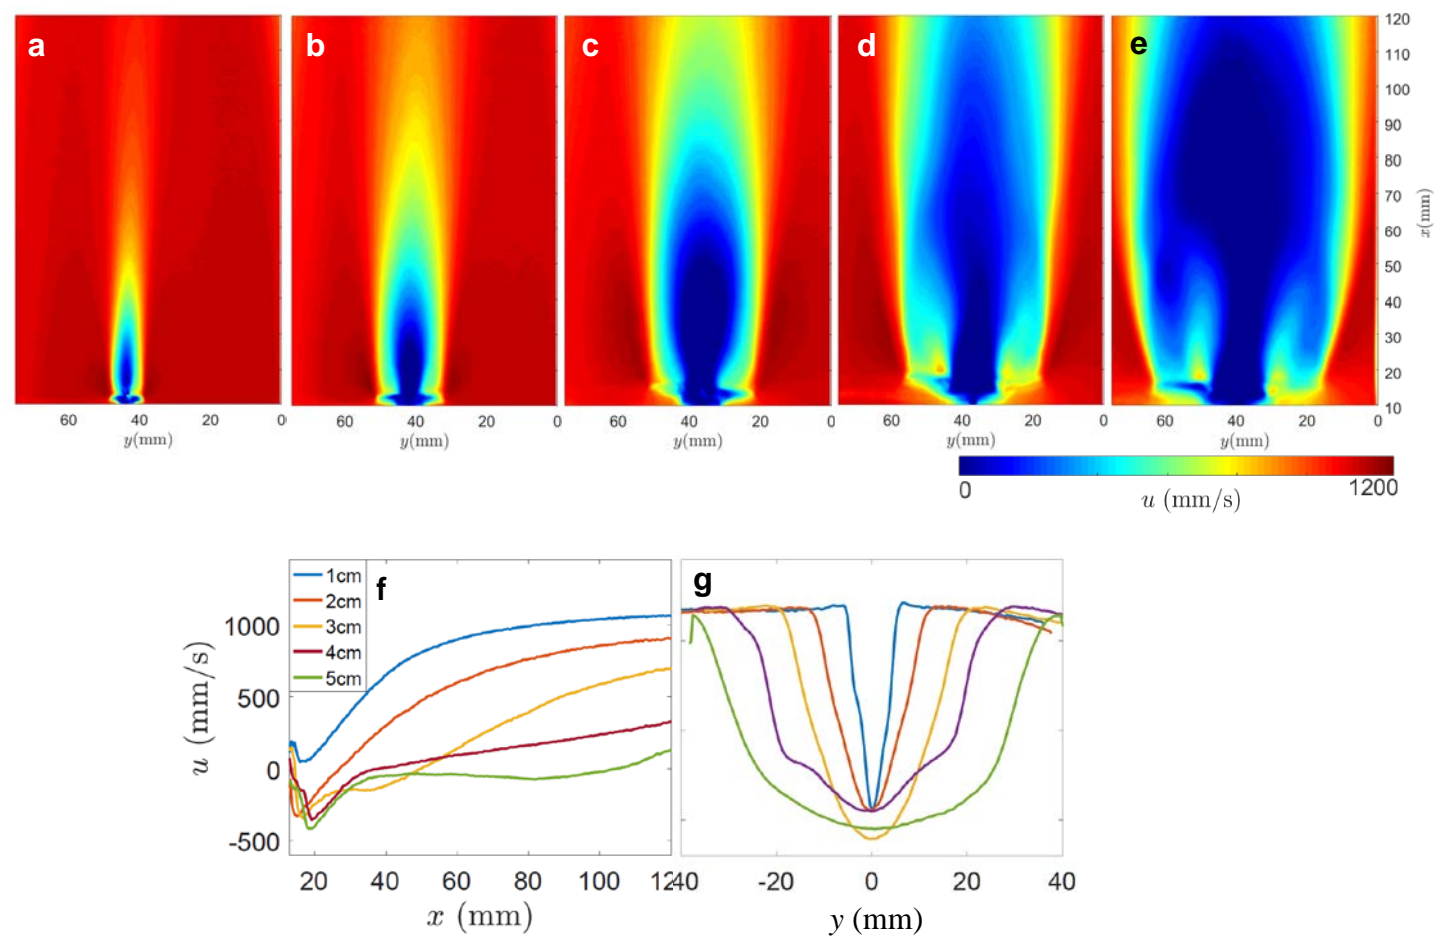

**Figure S35. PIV results for 3D IoT macrofliers.** Mean velocity field of (a) 1cm, (b) 2cm, (c) 3cm, (d) 4cm, and (e) 5 cm-diameter 3D IoT macrofliers at incoming velocity  $U=1.2\text{m/s}$ . Velocity profiles along the (f) center-axis and (g) spanwise direction at 12 diameter downstream.

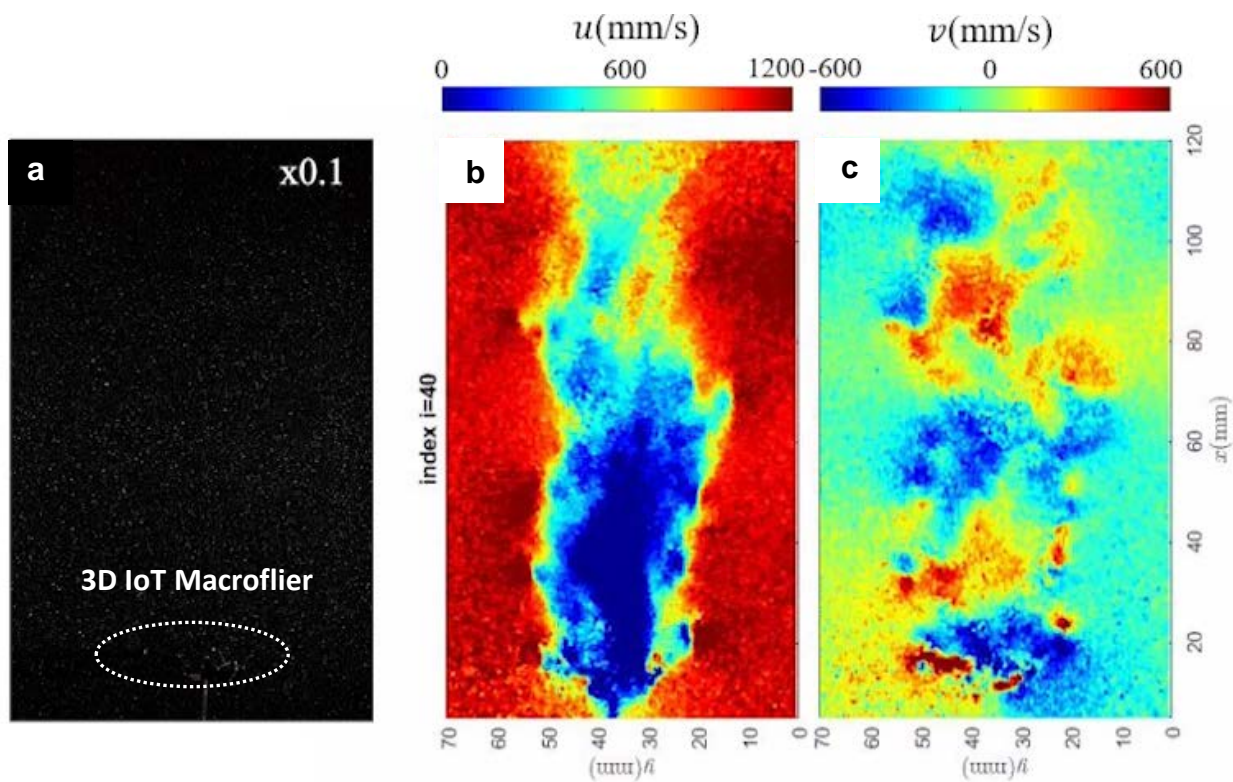

**Figure S36. High-speed PIV flow measurements for 3D IoT macrofliers.** (a) raw image sequence, (b) vertical velocity field, and (c) horizontal velocity field.
